# Supplementary material for: Tuning Fatty Acid Profile and Yield in Pichia pastoris
Source: MDPI journal article supplement (doi:10.3390/bioengineering10121412), 2023-12-12
Supplement: s1 [file s1]

## Supplementary files

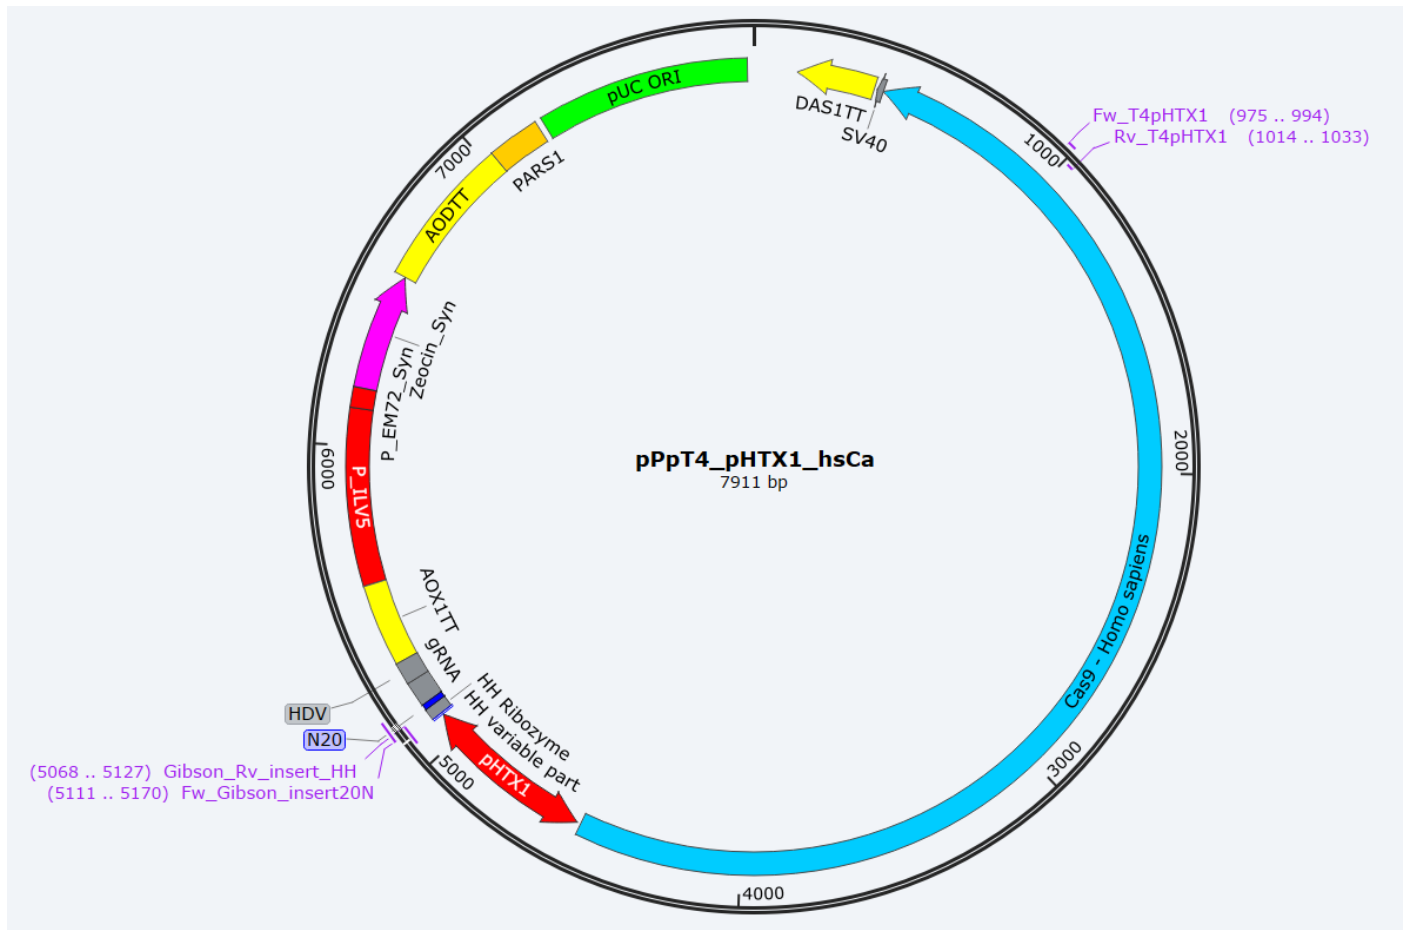

**Figure S1.** Cas9 gRNA vector map (pPpT4\_pHTX1\_hsCa): Primers for insertion of variable regions (N20 sequence and hammer head variable region) are indicated on the bottom left. Respective partner primers are indicated on the top right. Cas9 gRNA plasmids targeting new loci are assembled from two PCR products amplified with Fw\_Gibson\_insert20N & Rv\_T4pHTX1 and Gibson\_Rv\_insert\_HH & Fw\_T4pHTX1. Cas9 and gRNA expression are driven by the bidirection  $P_{HTX1}$  promoter. Vector maintenance is conferred by a Zeocin resistance cassette and a PARS1 sequence. Further details on vector function are given in the work of Weninger *et al.*.

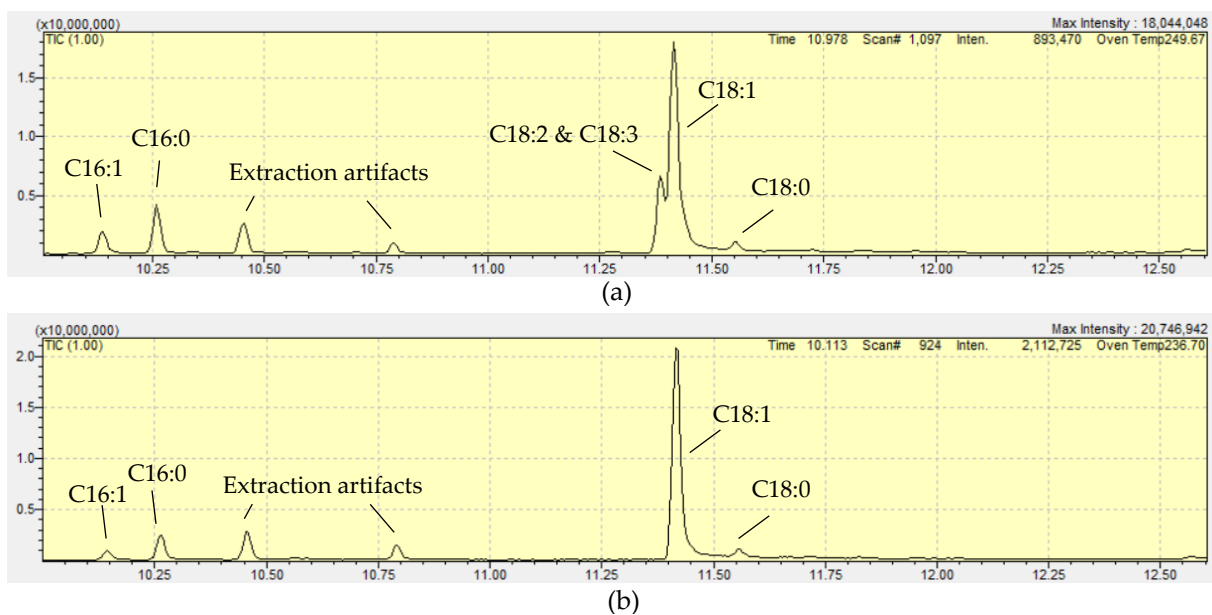

**Figure S2.** chromatograms for fatty acid methyl-ester analysis of the *P. pastoris* CBS7435 wild type strain (a), and strain *Pp*#12 with the deletion of *FAD12* (b). *Pp*#12 lacks polyunsaturated fatty acids (C18:2 and C18:3 common peak at ~11.37 min). Note: C18:2 and C18:3 elute simultaneously with this method. Clear separation was achieved with a different analysis method (Supplementary method S1).

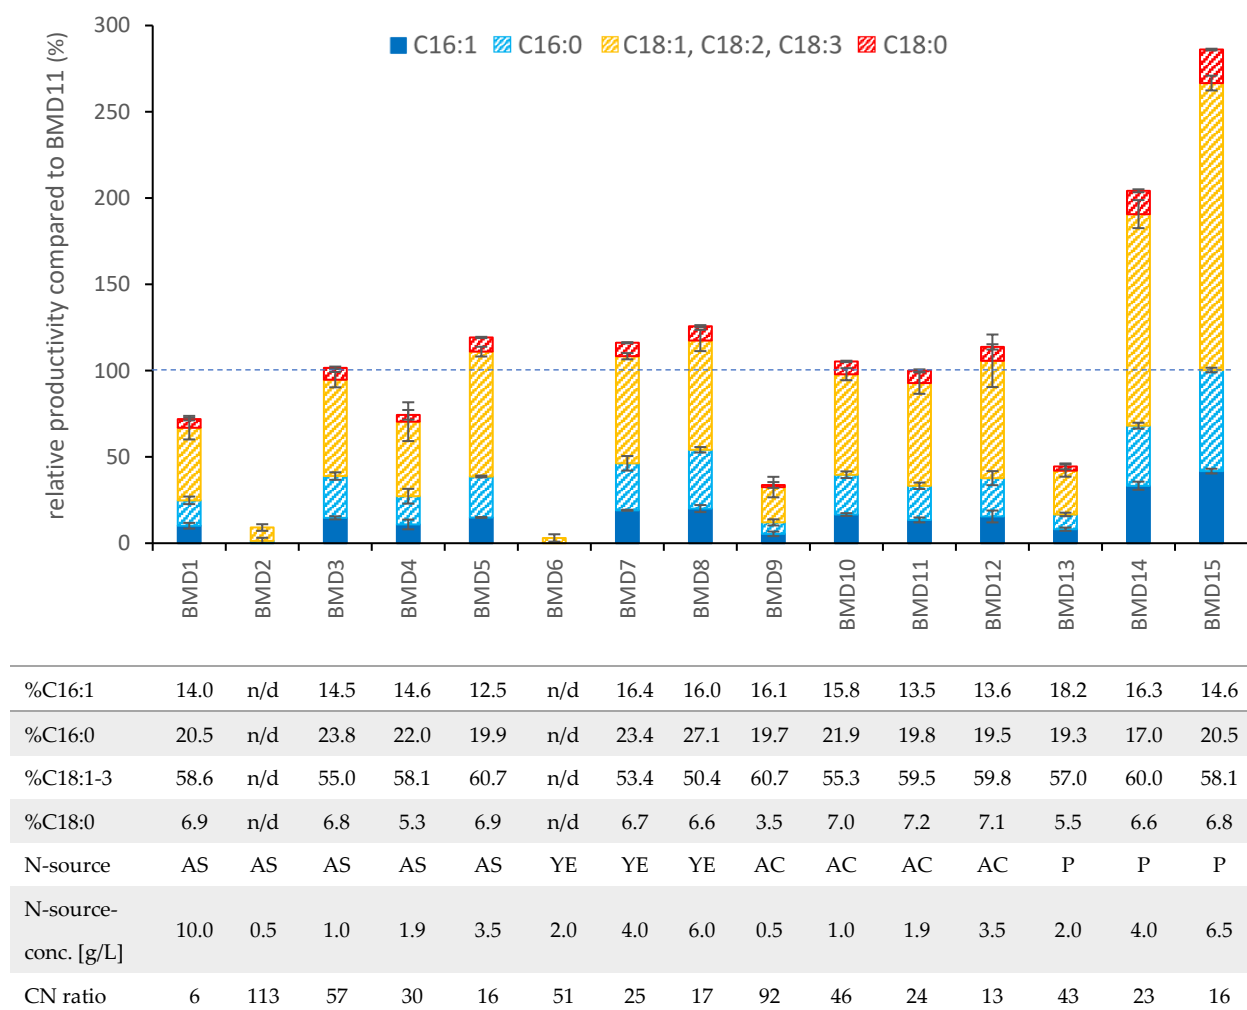

**Figure S3.** Relative FFA titers in the supernatant of strain *Pp#39* cultivated in different media with four nitrogen sources (N-source) and varying carbon to nitrogen ratios (compared to FFA titers obtained by cultivation in medium BMD11; media compositions are given in Supplementary Table 5). The table lists fatty acid contents, nitrogen sources (AS, ammonium sulfate; AC, ammonium chloride; YE, yeast extract; P, peptone), nitrogen source concentration and carbon to nitrogen ratios applied in the respective media. Cells were cultivated for 96 h at 28 °C and 320 rpm in 96-deep well plates (0.5 mL medium). The bars represent means  $\pm$  SD of biological triplicates.

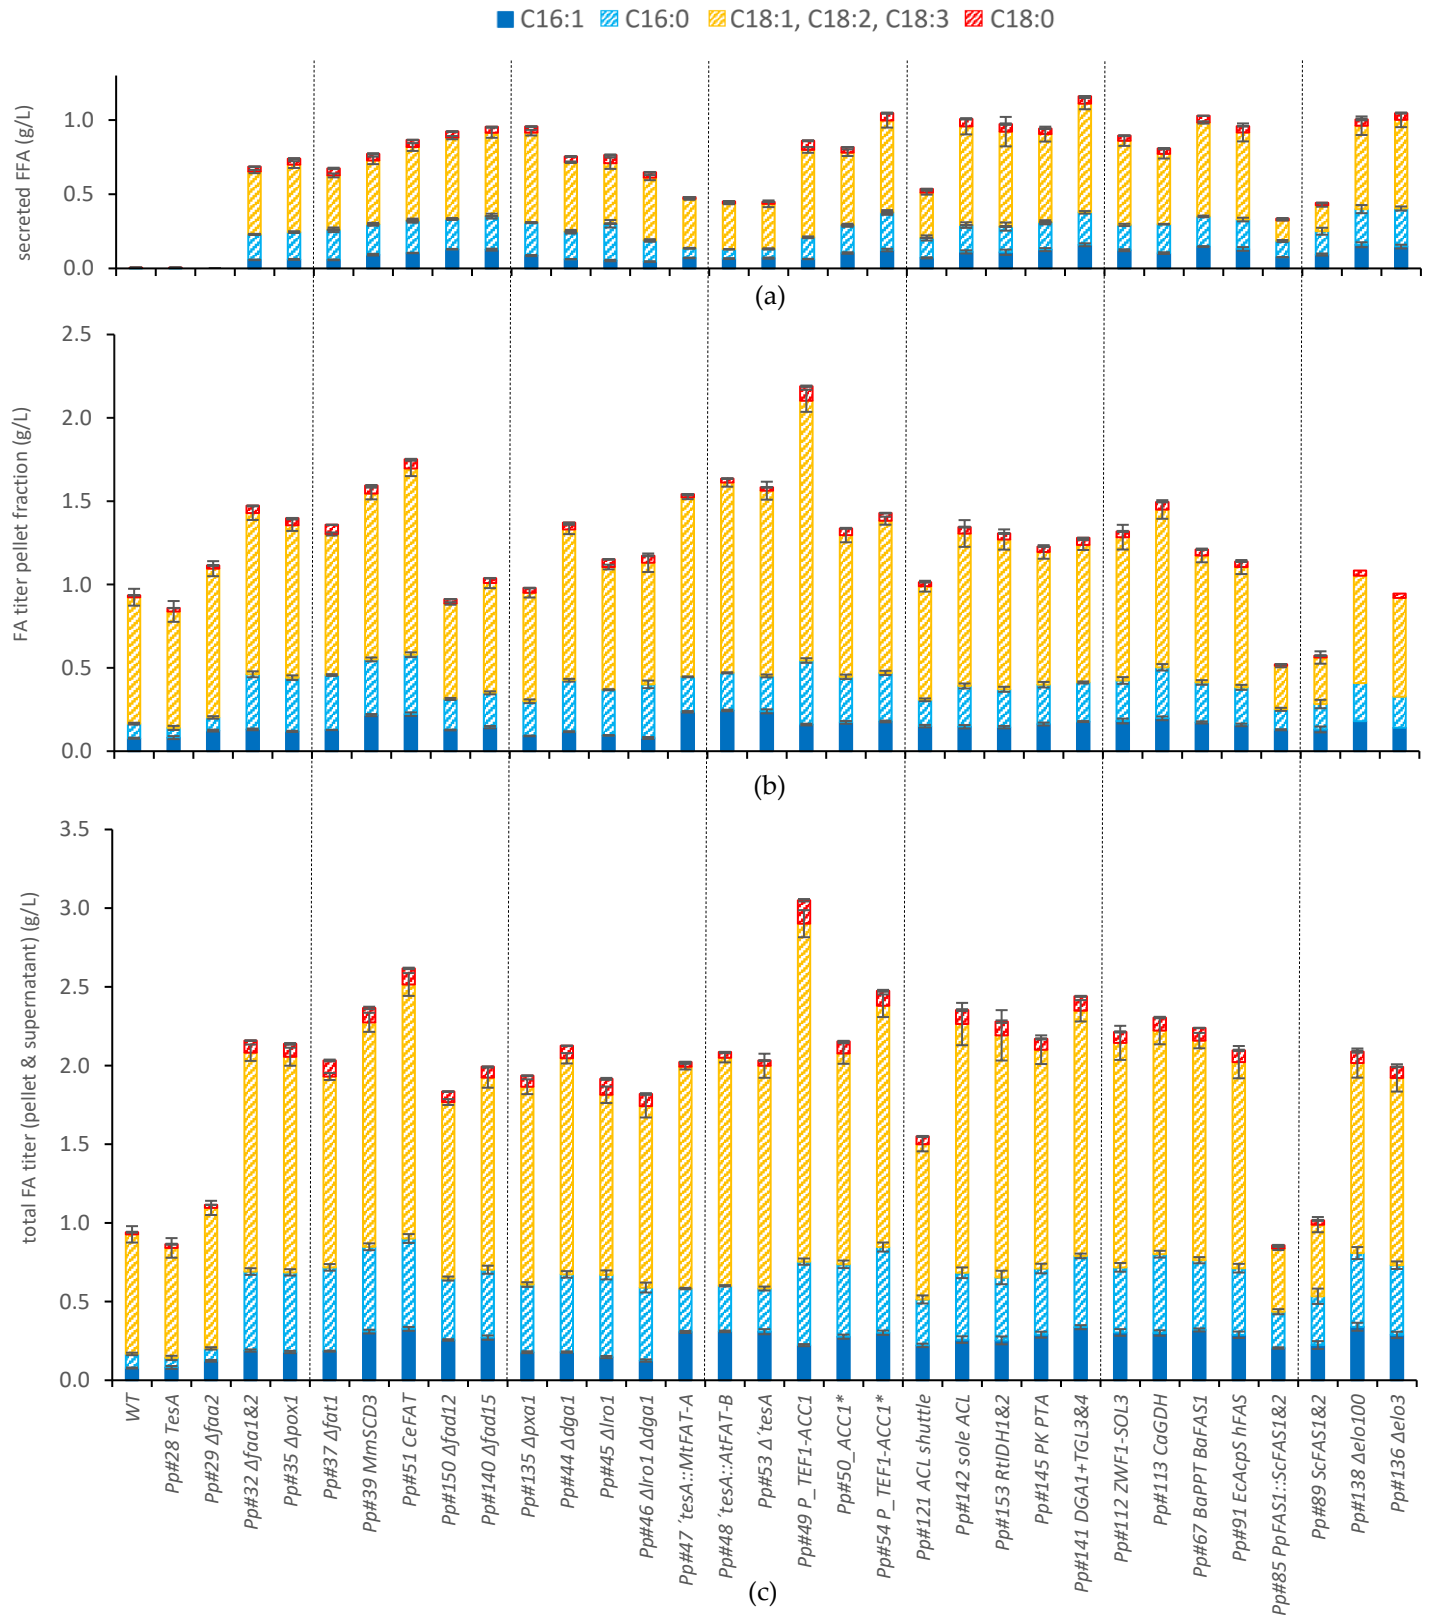

**Figure S4:** Fatty acid analysis of all *P. pastoris* strains (strain numbers and unique genetic features are given) generated in this study and wild type strain: (a) FFA in the supernatant, (b) fatty acids in the pellet fraction (sum of free fatty acids and bound fatty acids), (c) total fatty acids in the supernatant and the pellet

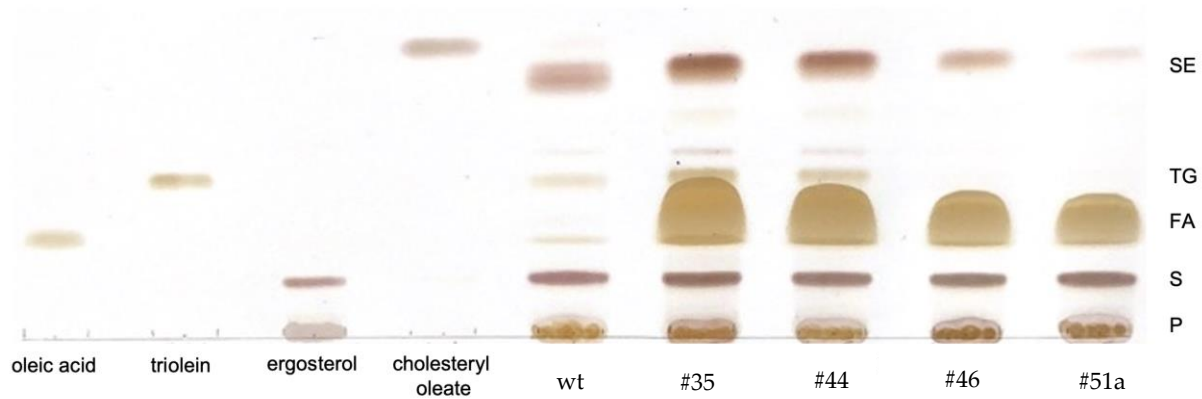

**Figure S5.** Thin layer chromatography of lipid extracts from *P. pastoris* strains engineered in neutral lipid storage *Pp*#44 (*Pp*#35  $\Delta dga1$ ), *Pp*#46 (*Pp*#35  $\Delta dga1 \Delta lro1$ ), *Pp*#51\* (*Pp*#35  $\Delta dga1 \Delta lro1 \Delta are2$ ) and background strain *Pp*#35 ( $\Delta ole1-2 his4::pGAP-$ '*TesA*  $\Delta faa2 \Delta pox1 \Delta faa1$ ). Total intracellular lipids were extracted from 60 OD units of washed cells using chloroform and methanol. Lipid extracts were separated using a mobile phase composed of petroleum, diethyl ether and acetic acid (70:30:2; per vol.) on silica coated aluminum plates (detailed method description: Supplementary method 1). Oleic acid, triolein, ergosterol and cholesteryl oleate were applied on the left side as standards. Band labels (right side) – abbreviations: FA, free fatty acids; TG, triacylglycerides; S, sterols ; SE, sterol esters; P, phospholipids. Strains *Pp*#46 and *Pp*#51\* with abolished acyl-acylglycerol transferase activity show no TG band. Strain *Pp*#51\* displays reduced sterol ester synthesis, due to the deletion of *ARE2* (Acyl-CoA:sterol acyltransferase). Strains with deletions of acyl-CoA synthetases (all strains, except wild type) exhibit increased levels of FFA.

**Table S1.** Synthesized codon optimized genes and DNA fragments used in this study

| Genes/T2A      | Sequence 5'-3'                                                                                                                                                                                                                                                                                                                                                                                                                                                                                                                                                                                                                                                                                                                                                                                                                                                                                                                                                                                                                                                                                                                                                   |
|----------------|------------------------------------------------------------------------------------------------------------------------------------------------------------------------------------------------------------------------------------------------------------------------------------------------------------------------------------------------------------------------------------------------------------------------------------------------------------------------------------------------------------------------------------------------------------------------------------------------------------------------------------------------------------------------------------------------------------------------------------------------------------------------------------------------------------------------------------------------------------------------------------------------------------------------------------------------------------------------------------------------------------------------------------------------------------------------------------------------------------------------------------------------------------------|
| <i>TesA</i>    | ATGGACACCTTGTTGATTTGGGTGACTCTTGTCCGCCGGTTACAGAATGTCGTCTTGCTGCTTGGCCAGCTTTG<br>TTGAACGATAAGTGGCAATCCAAGACCTCCGTTGTTAACGCTTCTATCTCTGGTGACACTTCCCAGCAAGGTTTGGC<br>TAGATTGCCAGCTCTTTTGAAGCAACACCAGCCAAGATGGGTTCTTGTGAGCTTGGTGGTAACGACGGTTTGAGA<br>GGTTTCCAACCACAACAGACTGAGCAGACCTTGAGACAAATCTTGCAGGACGTTAAGGCTGCTAACGCTGAGCCT<br>TTGTTGATGCAGATTAGACTGCCAGCCAACCTACGGTAGAAGATACAACGAGGCTTTCTCCGCTATCTACCCAAAGT<br>TGGCTAAAGAGTTTCGACGTTCCACTGCTGCCATTCTTCATGGAAGAGGTCTACTTGAAGCCACAGTGGATGCAAGA<br>TGACGGTATTACCCAAACAGAGATGCCAGCCATTTCATTGCTGATTGGATGGCTAAGCAGTTGCAGCCATTGGTC<br>AACCACGACTCTTAA                                                                                                                                                                                                                                                                                                                                                                                                                                                                                                                                                                    |
| <i>AtFAT-B</i> | ATGTTGCCAGACTGGTCTATGTTGTTGGTGTCTATCACCACCATTTCTTGGCTGCTGAGAAGCAGTGGATGATGTT<br>GGATTGGAAGCCTAGAAGATCCGACATGCTGGTTGACCCATTCCGGTATCGGTAGAATCGTTCAGGACGGTCTGGTT<br>TTCAGACAGAACTTCTCCATCAGATCCTACGAGATTGGTGCTGACAGATCCGCTTCCATCGAGACTGTTATGAACC<br>ACTTGCAAGAGACTGCCCTGAACCACGTTAAGACTGCTGGTTTGCTTGGTGACGGTTTCGGTTCTACTCCAGAGATG<br>TTCAAGAAGAACCTGATCTGGGTCGTACCAGAATGCAGGTTGTTGTTGACAAGTACCCAACCTGGGGTGACGTTG<br>TTGAAGTTGACACTTGGGTTTCCCAGTCCGGTAAGAACGGTATGAGAAGAGACTGGTTGGTCAGAGACTGTAACAC<br>CGGTGAGACTTTGACTAGAGCTTCTCCGTTTGGGTCATGATGAACAAGCTGACCAGAAGGCTGTCCAAGATTTCCT<br>GAAGAGGTTAGAGGTGAGATCGAGCCATACTTCGTTAACTCTGACCCAGTTTGGCTGAGGACTCCAGAAAGTTGA<br>CTAAGATCGACGATAAGACCCGCCGACTACGTTAGATCCGGTTTGACTCCAAGATGGTCCGACTTGGATGTTAACCA<br>GCACGTGAACAACGTGAAGTACATCGGTTGGATTTTGGAGTCCGCTCCAGTCCGGTATTATGGAAGACAAAAGCT<br>GAAGTCCATGACCTTGGAGTACAGACGTGAATGTGGTAGAGACTCCGCTCTTGCAATCTTGCATGCTGTTACTGGTT<br>GCGACATCGTAACTTGGCTACTGCTGGTGATGTTGAGTGCAGCACTTGTGAGATTGCAGGACGGTGCTGAAGT<br>TGTCAGAGGTAGAATACTGAATGGTCTCCAAGACTCCAATACTACTTGGGGTACTGCTCCATAA                                                                                                   |
| <i>MtFAT-A</i> | ATGGTGTCGAGAGAACTAATGGTTCCGGTGGTGTGTTTCTAACCCATCTTCTAACGGTTCCGCCTCCTTGTGGA<br>AGAGTTGAGATTGGGTTCTTTGGCCGAGGACGGTTTGTCTACAAAGAGAAGTTCATCGTCAGATCCTACGAGGTC<br>GGTATCAACAAGACTGCTACTATGGAAGCTATCGCCAACCTGTTGCAAGAGGCTGCTTGTAACCAGGTTTCAGACTT<br>TGGGTTACTCCACTGACGGTATGGGTACTTCTACACCATGAGACAGTTGCATTGATCTGGGTTACTGCCAGAATG<br>CACATCGAGGTCTACAAGTATCCAGCTTGGGGTGACATGATCGAGATCGAGACTTGGTTTGAGGCTGGTAGAGTCG<br>GTACTAGAAGAGACTTCGTTGTTAAGGACGCCACCGGTACTGTTATCGGTAGAGCTACTTCTAAGTGGGTCGCTAT<br>GAACCAGGACACCAGAAGATTGCAGAAGGTCAACGACAAGATCCTGGAAGAGATTATGTCCCACGCTCCAAGAA<br>CTCCAAGATTGGCTTTCCCAGAAGAGGACAACCTGCTCCTTGAAGAAGATCCCAAAGTTGGAGGAACCAAGCTCAGT<br>ACTCCAAGTTGGGTTTGAAGGCTAGAAGGGCTGACTTGGACATGAACCAGCAGTTAACAACGTCACCTACATCG<br>GTTGGTTGTTGGAGTCTTTGCCACAAGAGATCATCGACACCCACGAGTTGAGAAAGGTCACTTTGGACTACAGACG<br>TGAGTGTCAACACGACGATACTGTTGACTCCCTGACCTCTATGGAATTGATGGACAACGCTGAGGCTATCCCAGAG<br>TTGAACGGTACTAATGGATCTGCCACTGAGAGAAAGCACGAAGAGGACTGTTGTAGATTCTGCACTTCGTCAGAT<br>TCTCTGGTGACGGTCCAGAAGTCAACAGAGGTAGAATACTGAATGGCGTAGAAAGTCCACCAGATAA                                                                                                     |
| <i>CeFAT</i>   | ATGACCCAGATCAAGGTTGACGCTATCATCTCCAAGCAGTTCTTGGCTGCTGACCTGAACGAGATCAGACAGATGC<br>AAGAAGAGTCCAAGAAACAGGTCATCAAGATGGAATCGTCTGGAAGAACGTCGCCTTGTTGTTGCCTTGACA<br>TCGGTGCTTTGGTTGGTCTTTACCAGTTGGTTTCCAGGCTAAGTGGGCTACTGTTGGTTGGGTTTTCTTGTTGCACAC<br>CTTGGGTTCTATGGGTGTTACTGGTGGTGCTCATAGATTGTGGGCTCACAGAGCTTACAAGGCTACCTTGTCTTGGA<br>GAGTGTTCCTGATGCTGATCAACTCCATTGCCTTCCAGAACGACATTATCGACTGGGCCAGAGATCATAGATGTCA<br>CCACAAGTGGACTGACACTGACGCTGATCCACTTCCACTAACAGAGGTATGTTCTTCGCTACATGGGTTGGTTG<br>TTGGTCAAGAAGCACGACCAAGTGAAGATCCAAGGTGGTAAGTTGGACTTGCCGACTTGACGAAGATCCCGTCT<br>TGATGTTCCAGAGAAAGAACTACTTGCCCTGGTCGGTATCTTCTGTTTCGCTTTGCCAACTTTTCATCCCAGTCGTTT<br>TGTGGGGTGAGTCCGCTTTTCATTGCTTTCTACACTGCTGCCCTGTTTCAGATACTGTTTCACCTTGATGCTACCTGGT<br>GCATCAACTCTGTTTCCCATTGGGTTGGATGGCAACCATACGATCATCAAGCCTCTTCCGTTGACAACCTGTGGACT<br>TCTATTGCTGCTGTTGGTGAAGGTGGTCACAACCTACCATCACACTTCCCTCAGGACTACCGTACTTCTGAACACGC<br>TGAGTTCCTGAACTGGACCAGAGTCTTGATTGACTTCGGTGCTTCATCGGTATGGTCTACGACAGAAAGACTACCC<br>CAGAAGAGGTTATCCAGAGACAGTGCAAAAAGTTCGGTTGCGAGACTGAGCGTGAGAAGATGTTGCATAAGTTGG<br>GTAA                                                                            |
| <i>MmSCD3</i>  | ATGCCAGGTCACCTTGCTGCAAGAAGAAATGACTCCATCTACACTACTACCACCCTATCACTGCTCCACCCTCTG<br>GTTCTCTGCAAAACGGTAGAGAGAAGGTTAAGACCGTTCCACTGTACCTGGAAGAGGACATTAGACCAGAGATGA<br>AGGAGGACATCTACGACCCAACCTACCAAGACGAAGAAGTCCACCACCAAAAGTTGGAGTACGTTTGGAGAAAC<br>ATCATCCTGATGGCCTTGTTGCATGTGGTGCTGTACGGTATTACTTTGGTTCCATCCTGCAAGCTGTACACCTGT<br>TTGTTCCGCTTCGTTACTACGTCATCTCCATCGAAGGTATCGGTGCTGGTGTTTCATAGATTGTGGTCCCACAGAACT<br>TACAAGGCCAGATTGCCTCTGAGAATCTTCTGATTATCGCCAACACTATGGCCTTCCAGAACGACGTTTACGAGT<br>GGGCTAGAGATCATAGAGCCACCACAAGTTCTCTGAAACTCATGCTGATCCACACAACCTCCAGAAGAGGTTTCTT<br>CTTCTCTACGTCGGTTGGCTGTTGGTTAGAAAGCACCCAGCCGTCAAAGAAAAAGGTGGTAAGCTGGACATGTCT<br>GACTTGAAGGCTGAGAAGTTGGTCATGTTCCAGAGAAGGTACTACAAGCCAGGTATCCTGCTGATGTGCTTCATCT<br>TGCCAACTCTTGTTCTTGGTACTGCTGGGGTGAGACTTCTTGAACCTCTTACGTTGCCACCTTGTGAGATACG<br>CCGTTGTTTTGAACGCCACCTGGTTGGTTAATTCCGCTGCTCACTTGTACGGATACAGACCATACGACAAGAACATC<br>GACCAAGACAGAACGCTTGGTTTCCCTGGGTTCTATGGGTGAAGGTTCCACAACCTACCATACGCTTCCCTTA<br>CGACTACTCTGCTTCTGAGTACAGATGGCACATCAACTTACCACCTTCTTCATCGACTGCATGGCTGCTTTGGGTCT<br>TGCTTACGACAGAAAGAGAGTTTCCAAGGCCACTGTCTTGGCCAGAATCAAGAGAACTGGTGACGGTTCTCACAA<br>GTCCGGTTAA |

|              |                                                                                                                                                                                                                                                                                                                                                                                                                                                                                                                                                                                                                                                                                                                                                                                                                                                                                                                                                                                                                                                                                                                                                                                                                                                                                                                                                                                                                                                                                                                                                                                                                                                                                                                                                                                                                                                             |
|--------------|-------------------------------------------------------------------------------------------------------------------------------------------------------------------------------------------------------------------------------------------------------------------------------------------------------------------------------------------------------------------------------------------------------------------------------------------------------------------------------------------------------------------------------------------------------------------------------------------------------------------------------------------------------------------------------------------------------------------------------------------------------------------------------------------------------------------------------------------------------------------------------------------------------------------------------------------------------------------------------------------------------------------------------------------------------------------------------------------------------------------------------------------------------------------------------------------------------------------------------------------------------------------------------------------------------------------------------------------------------------------------------------------------------------------------------------------------------------------------------------------------------------------------------------------------------------------------------------------------------------------------------------------------------------------------------------------------------------------------------------------------------------------------------------------------------------------------------------------------------------|
| <i>RhDH1</i> | <p>ATGTTTCCAAAACCACTGGCTTTAAGAAACCAGCTTATAGGTCAGGCTAGGTCCGCCACAACCTCTGGGTGTTGGAA<br/> TCTCAAGACCTCCGCTATTCAGCCTACCAAGTACGGAGGTGTTTATTCTGTAACCTTTGATCCCAGGAGACGGAGT<br/> GGGTAAAGAAATTAATCAATCCGTTGAGGAAATTTTTGAACACGCAAACGTCCCCGTAGAGTTTGAGAAAGTTTAAAT<br/> GTCTCTGGTGGTACTTCCGAAGATGCTGCTTTGTTCAAAAAGGTCAATGGATTCTCTGAGGAGAAAACAAGGTAGGTT<br/> TGAAGGTATCTTATACACCCCCGTCGAGAGATCAGGACACACAAGTTGGAACGTTGCTATGAGACAGCAATTAG<br/> ATATTTATGCCAGTGTGGTGCTGTGCAAGTCTGTCCCCGGTGTTCCTACTAGACACAAGGATGTAGATTTTGCTATC<br/> ATTCGTGAAAATACTGAGGGTGAATACTCCGGTCTGGAACACCAATCTTCACCTGGTGTAAGTGGAAATCCCTTAAAA<br/> TTATGACTCGTCACAAGACTGAGAGGATTGCCAGATTTGCTTTGCGACTACGCTATCAAAAACGGTCGTAACACGT<br/> AACCGCTATTCAAGGCAAACATCATGAAGTTGGGAGATGGTCTGTTTCTGAACACTTGCAGACGTGTAGCCGAG<br/> GAGTATAAAGATTCCGGAATAACCTTTTCTGACATGATAGTCGATAACACCAGTATGCAACTTGTTAATAGACCCC<br/> AACAAATTCGATGTTATGGTTATGCCTAATCTGTATGGATCTATCATATCTAATATAGGAGCAGCTCTGGTGGGAGGT<br/> CCTGGAATTGTGCCAGGAGCCGACATCGGTCTGTGAGTTTCGATTGTTTGAACCCGGATGTAGACATGTGCGCTAAAG<br/> ATATTCAAGGTCAGGATTCCGCAAACCCAGCCGCAATGATTTTGAGTGCAACTATGCTTTTACGTTACCTTGGTTGT<br/> GACCACCACGCAAAATGCAATTGCTTCTAGTGTTTACAAAATTTTGGAAAGAGGGAAAGATCCGTACCCCTGACTTGG<br/> GAGGAACATCTCATACCACCGATTTCACCCATGCAGTTATTAAGGATTGCAATAA</p>                                                                                                                                                                                                                                                                                                                                                                                                                                                                                                                                                                                       |
| <i>RhDH2</i> | <p>ATGTTTACTAGGACTTCTTTGAGAACAGCATCTAGAGCATTTTCCACATCAGCTCCAGGGCTTACGCCTCTCAGGG<br/> TGCCGCTCCTAGTGGATATGTTCCCAATACTAATGCCGATGGTACTTATAATGTTACTTTAATTCAGGTGACGGTA<br/> TAGGACCAGAGATCTCCAGATCCGTAAAAGAGATTTATGACGCCGCAAAGGTTCTATCAAATGGGAGGAGGTAA<br/> GTGTAACACCAATCTTAGTAGACGGTGTTCAACTATTCCAGCTGACGCTATCGCTTCTATCAAAAAGAACTACTATT<br/> GCCTTGAAAGGACCTTTGGCCACACCAATCGGAAAAGGTCATGTTTCTTGAACCTTAACCTTAAGGAGAACTTTCA<br/> ATTTGTATGCAAACGTAAGACCATGCCGTTCAATTGAAGTTACAAAAGTCTTACGATAATGTCGATACTGTTTGTG<br/> ATTAGGGAAAACACCGAAGGAGAGTACTCTGGTATCGAACATGAGGTGGTTGATGGTGTGGTACAATCAATTAATA<br/> TTGATTACCCACAACGCTTCATCTAGAGTCGCAAGATACGCTTTCGAGTACGCTAGGGCAAACAAGAGACCTCAC<br/> GTAAGTCTGTCCATAAAGCCCCTATCATGAAGATGTCCGATGGAATGTTTCTGAGAGCATGCCGTGAATTGGCTC<br/> CAGAATATCCAGATATCAAATACGATGAGGATTTACTGGACAGGGTATGCCTGAGAGTTGTACAAAATCCAGCTC<br/> CTTACTCAGACAGAGTATGGTTATGCCTAATTTATATGGTGATATTTTGTCTGATATGTGTGCAGGACTGATCGGA<br/> GGTTTAGGTCTTACTCCATCTGGTAACATAGGAAAAGATGCTTCTATATTTCGAGGCTGTTCACGGAAGTGCTCCTGA<br/> TATTGAAGGAAAAGAACTTGGCCAACCCCACTGCTCTTTTGTGAGTTTCTTGATGATGTTACGTCATATGAAGTTGA<br/> CCCAGAAAAGCTGACCTGATCGAGAAGGCAGTGCTTCCACCATCGCTGAAGGAACAAGAACTAGAGACCTTGGAG<br/> GTAAAGCTTCTACTCAACAATTTACTGACGAAATCCTGAAGAAATTATAA</p>                                                                                                                                                                                                                                                                                                                                                                                                                                                                                                                                                                                                         |
| <i>CkPA</i>  | <p>ATGAAACTTATGGAGAACATATTCCGTTTGGCCAAGGCTGACAAAAAAGATAGTCCTTGCTGAAGGTGAGGAG<br/> GAGAGGAATATTAGAGCTAGTGAAGAGATTATTCTGATGGTATTGCAGATATAATCTTGGTCGGTTCGAGTCTG<br/> TAATTAAGGAGAATGCTGCAAAGTTTGGAGTAAATTTAGCCGGCGTGAGATCGTGGATCCTGAAACATCATCTAA<br/> AACAGCTGGATACGCTAACGCATTTTACGAAATCAGAAAGAACAAGGGAGTTACTCTGGA AAAAGGCAGATAAGA<br/> TAGTCCGTGATCCTATCTACTTTGCTACTATGATGGTAAAAGTGGGTGATGCTGATGGTCTTGTGCTGAGCCATC<br/> CACACAAGTGGTACTTGTGAGGCCAGGTCTGCAAAATGTGAAGACAGTACCAGGTGCTAGTGTGGTGTCTTCTG<br/> TTTTTTGATGTCGGTACCAGATCGCAATACGGTGAGGATGGTTTCTGTTATTGCTGATGTCGGTGTGACAGTAT<br/> GTCCAAGTGCAGAAAGAGCTGTCATCTATTGCAATAACAAGTCTGTAACCCGCCAAGAATCTTTGCAAGATTGAAC<br/> CAAGAGTTGCCATGTTGAGTTTTTCTACAATGGGTTCTGCCAGTCACGAGTTAGTTGATAAGGTACACGAAAAC<br/> AAAGTTGGCTAAGGAAGCAAGACCAGATTTGGATATTGATGGCGAGTTGCAACTGGACGCCTCTCTTGTTAAAAA<br/> GGTTGCTGATCTTAAAGCACCAGGTTCTAAAGTGGCTGGA AAAAGCTAACGTTTTAATCTTTCCAGACATTACGGCA<br/> GGTAACATCGGTTACAAGTTGGTTAGAGGTTTCGAAAAGCCGAAGCTATTGGTCTTCTGCAAGGATTGCTA<br/> AGCCAATTAACGACTTGTCTAGAGGCTGTCTGTTGACGACATTGTTAAAGTTGTGGCTGTTACTGCTGTTCAAGCT<br/> CAAGCTCAGGGATAA</p>                                                                                                                                                                                                                                                                                                                                                                                                                                                                                                                                                                                                                                                                                                                                             |
| <i>BbPKA</i> | <p>ATGACCAGTCTGTAAATCGGCACTCCATGGAAAAAAGTGAATGCTCCGTTTCTGAGGAATCTTTGGAAGGAGTAG<br/> ATAAGTATTGGAGGGTTGCCAACTACTTGTCCATTGGACAAATCTACCTTAGATCCAATCCACTAATGAAGGCTCC<br/> CTTTACCAGAAAGACGTGAAGCATAGGTTGGTCTATTGGGAACCAACCCAGGTTTAAATTTCTTATCCGGA<br/> CATATTAACAGATTATCGCTGACCACGGTCAGAAACCCGTTATTATTATGGGACCAGGACAGGTGGCCACGCCG<br/> GTACGTCACAGAGTTATCTAGATGGAACCTTACACGGAAAACCTTTCCAAAGATTACTAAAGATGAAGCTGGTTTACA<br/> AAAGTTTTTTAGGCAGTTTTATACCCAGGTGGAATTCCATCTCATTTTGTCCAGAAAACCCAGGAAGTATACACG<br/> AGGGTGGTGAATTGGGCTACGCATTGAGTCATGCCTATGGTGCTATCATGGACAATCCCTCACTATTCTGTCGCAGC<br/> CATTGTTGGAGATGGTGAAGCTGAAACCCGACCCTTGGCTACTGGTTGGCAATCAAACAAGTTAGTCAATCCTAGA<br/> ACAGATGGTATCGTACTTCTATTTTGCAATTTGAATGGTTACAAAATTGCTAACCCAACTATCCTGAGTCGTATATC<br/> AGATGAGGAACTACATGAATTTTTCCACGGAATGGGATACGAGCCTTATGAATTTGTGCTGGTTTTGACGATGAA<br/> GACCATATGTCCATTACAGAAGGTTTCGCTGAACTATGGGAAACGATATGGGATGAGATATGCGACATAAAAGCA<br/> GCCGCACAAAACCGATAATGTCCACAGACCAATTTACCCAATGCTAATTTTAGGACTCCTAAGGGATGGACATGTC<br/> CTAAATACATTGACGGTAAAAAAACAGAGGGATCCTGGAGAGCTACCAAGTGCCATTAGCTAGTGCAAGAGAT<br/> ACAGAGGCTCACTTCGAAGTCTTGAAAAATTGGCTAGAATCATACAAACCTGAAGAAGTTTTGATGCTAACGGGA<br/> GCTGTCAAGGACGACGTTTTAGCTTTTATGCCAAAGGGCGAACTACGTATTGGTGCCAATCCTAATGCTAACGGTG<br/> GTGTTATTAGGGATGATTTGAAGCTGCCTAATCTTGAAGACTATGAAGTTAAGGAAGTCGCTGAATACGGACATGG<br/> ATGGGGACAGTTGGAAGCTACAAGAACTCTGGGAGCCTATACCCGTGACATAATTGTAACAATCCAAGAGATTT<br/> CAGGATTTTTGGACCTGATGAGACCGCTAGTAACCGTTTACAGGCTAGTTACGAAGTTACTAATAAACAGTGGGAT<br/> GCTGGCTATATTTAGATGAAGTGGACGAGCATATGCACGTCTCTGGACAAGTTGTGGAACAACCTGTCAGAGCATC<br/> AAATGGAGGGTTTTCTTGAAGCTTATCTTTTAACTGGAAGGCATGGTATTTGGTCTTCTTACGAGTCTTTTGTTATG<br/> TTATTGACTCCATGCTTAACAGCAGCCTAAATGGCTTGAGGCTACTGTTAGAGAAATTCATGGAGGAAGCCAT<br/> TGCTCCATGAACCTTCTAGTGTCATCCACGTTTGGAGACAGGACCACAACGTTTTTCACACCAAGATCCAGGT</p> |

|              |                                                                                                                                                                                                                                                                                                                                                                                                                                                                                                                                                                                                                                                                                                                                                                                                                                                                                                                                                                                                                                                                                                                                                                                                                                                                                                                                                                                                                                                                                                                                                                                                                                                                                                                                                                                                                                                                                                                                                                                                                                                                                                                                                                                                                                                                                                                                                                                                                                                                                                                                                                                                                                                                                                                                                                                                                                                                                                                                                                                                                                                                                                                                                                                                                                                                                                                                                                                                                                                                                                                                                                                                                                                                                                                                                                                                                                                                                     |
|--------------|-------------------------------------------------------------------------------------------------------------------------------------------------------------------------------------------------------------------------------------------------------------------------------------------------------------------------------------------------------------------------------------------------------------------------------------------------------------------------------------------------------------------------------------------------------------------------------------------------------------------------------------------------------------------------------------------------------------------------------------------------------------------------------------------------------------------------------------------------------------------------------------------------------------------------------------------------------------------------------------------------------------------------------------------------------------------------------------------------------------------------------------------------------------------------------------------------------------------------------------------------------------------------------------------------------------------------------------------------------------------------------------------------------------------------------------------------------------------------------------------------------------------------------------------------------------------------------------------------------------------------------------------------------------------------------------------------------------------------------------------------------------------------------------------------------------------------------------------------------------------------------------------------------------------------------------------------------------------------------------------------------------------------------------------------------------------------------------------------------------------------------------------------------------------------------------------------------------------------------------------------------------------------------------------------------------------------------------------------------------------------------------------------------------------------------------------------------------------------------------------------------------------------------------------------------------------------------------------------------------------------------------------------------------------------------------------------------------------------------------------------------------------------------------------------------------------------------------------------------------------------------------------------------------------------------------------------------------------------------------------------------------------------------------------------------------------------------------------------------------------------------------------------------------------------------------------------------------------------------------------------------------------------------------------------------------------------------------------------------------------------------------------------------------------------------------------------------------------------------------------------------------------------------------------------------------------------------------------------------------------------------------------------------------------------------------------------------------------------------------------------------------------------------------------------------------------------------------------------------------------------------------|
|              | <p>GTTACTTCCGTTTTACTGAATAAGTGTTCCATAATGATCACGTAATTGGAATTTACTTTGCCACTGATGCTAATATG<br/> CTATTAGCCATCGCTGAAAAGTGTTACAAGTCTACTAATAAGATAAACGCTATTATTGCTGGAAAGCAACCAGCTG<br/> CTACCTGGCTTACCTTAGATGAGGCCAGAGCTGAATTGGCCAAAGGTGCAGCTGCCTGGGATTGGGCATCCACTGC<br/> AAAGAACAATGATGAAGCAGAGGTCGTGTTGGCTGCAGCTGGAGATGTTCCACCCAAGAAATTATGGCAGCTTC<br/> CGATAAGCTAAAAGAACTGGGCGTCAAGTTCAAAGTGGTTAATGTAGCCGATTTATTGAGTTTGCACTGCAAAA<br/> GAGAATGATGAAGCTCTGTCCGACGAAGAATTCGTGATATATTTACCGCTGACAAACCTGTTCTGTTCCATACC<br/> ATTCATATGCTCACGATGTTAGAGGTCTTATCTATGATCGTCCAAATCACGATAATTTCAATGTGCACGGCTATGAG<br/> GAAGAAGGATCAACAACGACTCCTTATGATATGGTTAGAGTCAACCGTATCGACAGGTATGAACCTAACCGCTGAA<br/> GCTTTGCGTATGATCGACGCTGATAAATACGCCGATAAAATAGATGAGTTGGAAAAATTTAGAGATGAAGCTTTCC<br/> AATTCGCCGTCGATAAAGGCTACGATCATCTGACTACACAGATTGGGTGTATTCTGGTGTTAATACCGACAAAAA<br/> AGGCGCTGTGACCGCTACAGCTGCTACTGCAGGTGACAACGAATAA</p>                                                                                                                                                                                                                                                                                                                                                                                                                                                                                                                                                                                                                                                                                                                                                                                                                                                                                                                                                                                                                                                                                                                                                                                                                                                                                                                                                                                                                                                                                                                                                                                                                                                                                                                                                                                                                                                                                                                                                                                                                                                                                                                                                                                                                                                                                                                                                                                                                                                                                                                                                                                                                                                                                                                                                                                                                                                                                                                                                                                |
| <i>RtACL</i> | <p>ATGTCCGCTAAGCCATTAGAGAGTACGACGCCAAGTTGTTGTTGGCTTACCATTGGCTAGAGCCCCAACTGCTG<br/> GTTCTAAGGCTGTTGCTAGAGATGGTTTCCAGTCTCCAGAGGTTAAGGTTGCTCAAGTTTCTTGGGACCCAGAGACT<br/> AACCAGGTTACTCCAGATGCTGCTTTGCCACACTGGGTTTTACTGAGAAGTTGGTTGTTAAGCCCGACCAGCTGAT<br/> CAAGAGAAGAGGTAAGGCTGGTTTGTGGCCTTGAACAAGACTTGGGCTGAAGGTAAGCAATGGATCGCTGAAAG<br/> AGCTGGTAAGCAGGTTTCAAGTTGAAAAGACCACCGGTACTCTGAACAACCTTCACTGTTGAGCCATTCTGCCACAT<br/> CCATCTGATGCTGAGTACTACATCTGCATCAACTCCGTTAGAGAGGGTGACGTCACTTGTTCACCTACCGAAGGTG<br/> GTGTTGACGTTGGTGATGTTGATGCTAAGGCCTTGACCTTGTGGTTCCAGTTGGTGTTGAATTGCCATCCAGGGAC<br/> GAAATTAGATCCCAGTTGTTGAAGCACGTTACCGGTGCTGAAAGACAAGAGGCTTTGATCGACTACATCATCAGA<br/> CTGTAATCCGTTACGTCGACTTGCACTTTGCTTACTTGGAGATCAACCCATTGGTTGCCGTTGAGAACCCATCCAC<br/> TGGAAGACTGACATCTTCTACTTGGACATGGCTGCCAAGTTGGACCAGACTGCTGAATACGTTGTTGGTCCAAAG<br/> TGGGCTATCGCTAGAGATCCATCCATTATCAACCCAGCTGCTGCTCCAATGTCCAACGGTAAGATTCTGCTGATAA<br/> GGGTCCACCAATGTTCTGGCCACCACCTTTTGGTAGAGACTTGACCAAAGAAGAGGCCTACATTGCTAAGCTGGAC<br/> GGTCTACTGGTGCTCCTTGAAGTTGACTGTTTGAACGCTGAGGGTAGAATCTGGACTATGGTTGCTGGTGGTGG<br/> TGCTTCTGTTGTTTACTCTGATGCTATTGCTGCTACGGTTTCGCTCACGAATTGGCTAACTACGGTGAATACTCTGG<br/> TGCTCCAACCTCAGACTCAGACTTACGAGTACGCTAAGACCATCTTGGACCTGATGACTAGAGGTACTCCAAATCCA<br/> CAGGGTAAGCTGTTGTTTCATCGGTGGTGGTATCGTAACTTCACTAACGTTGCTGCTACCTTCAAGGGTATCATCAC<br/> CGCCTTGAAAGAGTACCAGCACAGATTGCAAGAGCACAAAGGTCAGAATCTTCGTCAGAAGAGGTGGTCCAAACTA<br/> CCAAGAGGGTTTGAAGGCTATGAGACTGTTGGGTGAAACCTTGGGTGTTGAGATCCAAGTTTTCGGTCCAGAGACT<br/> CACATCACCTCCATCGTTCACCTTGGTTTGGGTTTATCAAGTCCGTTGACGACGCTTTGAAGGTTCCAGGTGCTAG<br/> AGCTGCTGCAGATGCTACTGGTACTTTGACTCCAGTTCCAGGTTCTCCAAAGTCCAGAGCTGCTCAATTGCCAACTG<br/> GTGTTTCCACTCCATCTAGACAACAACCACAGGACAACATCGTGAGCTTCTCTGACAAGGTTTCATGCTCCAGACTC<br/> TGGTAGACCATGGTACAGACCATTGACGAGACTACCAGATCCATCGTTTACGGATTGCAGCCAAGAGCTATCCA<br/> GGGTATGTTGGATTTGCACTTCGCTTGGGTAGAGAGACTCCTTCTGTTGCTGCAATGGTTTACCCATTGGTGGTCA<br/> CCACGTCCAGAAGTTTTACTGGGGTACAAAAGAGACTCTGCTGCCAGTTTCACTTCCATGAAGGAAGCTGTTGCC<br/> AAGTGTCCAGACGCTGACGTTGTTGTTAACTTCGCTTCTCCAGATCCGTTACCAATCTACTTTGGAGGCTTTGGA<br/> GTTCCCAAGATTAAGGCTATTGCCTTGATTGCCGAAGGTGTCACAGAAAGACATGCCAGAGAAATTTGCAAGCTG<br/> GCCAAGAAGAAAGAGGTCATCATTATCGGTCCAGCCACTGTCCGGTGGTATTAAGCCAGGTTGTTTTCAGAATCGGTA<br/> ACACCGGTGGTATGAACGAGAACATCTTGCTCCTCAAGTTGTACAGAGCCGGTTCCGTTGGTTACGTTTCTAAGTCT<br/> GGTGGTATGTCTAACGAGCTGAACAACATCCTGTCCTTGACTACTGACGGTGCTTACGAGGGTATTGCTATTGGAG<br/> GTGACAGATACCCAGGTACTACTTTCATCGACCACTTGTGAGATACGAGGCTGACCCAAACTGCAAGATGTTGGT<br/> TTTGCTGGGTGAAGTCGGAGGTGTGCAAGAGTACAGAGTTATCGAAGCTGTTAAGTCCGGTCAGATCAAGAAGCC<br/> AATCGTTGCTTGGGCCATTGGTACTTGCCTAAGATGTTGCTACTGACGTTCAATTTGGTTCACGCTGGTTCCATGG<br/> CTAACTCTGACTTGGAACCTGCTGAGGCTAAGAACAACGCTATGAGAGCTGCCGGTTTTATCGTCCCACCAACTTT<br/> CGAAGAATTGCCACAGGTTTTGGCCGAAACTTACCAGAAATTTGGTCCGTGACGGTACTATCCAGCCAAAGCCAGA<br/> AGTTCCACCACCACAAATTCGAATGGACTACAATGGGCTCAGACCCCTTGGTATGGTTGAGAAAGCTGCTGCTTTC<br/> ATCTCCACTATCTCGACGAGAGAGGTCAGAGTTGTTGTACGCTGGTATGCCAATCTCCAAGGTTTTCGAAGAGG<br/> ACATCGGTATTGGTGGTGTGCTTTCCTTGCTGTGTTCAAGCGTAGATTGCCAGCTTACGCTACCAAGTTCTTGGAG<br/> ATGGTTCTGATGTTGACTGCCGATCATGGTCCAGCTGTTTCTGGTGCTATGACTACTGTTATCACCAGTACAGCCGG<br/> TAAGGACTTGGTTTCTCCTTGGTCTGCTGGTTTGTGCTACTATCGGTGATAGATTGGAGGTGCTTTGGACGGTGTGCTG<br/> TCAAGAATTCAGTACGCTTTTCAAGCTGGTCTGACCCCAAGAGAATTCGTTGACTCTATGAGAAAGGCTAACAA<br/> GCTGATCCCAGGTATCGGTACACAAGGTTAAGTCTAAGGCTAACCCAGACAAGAGAGTCTGAGCTGGTTAAGAAGCTA<br/> CGTGTTCAAGCACTTCCATCCGCTAAGTTGTTGGAGTACGCTTTGGCCGTTGAGGACGTTACTTCTGCTAAGAAGG<br/> ACACCTTGATCCTGAACGTTGATGGTGCTATCGCCGTTTCTTCTGTTGACCTGTTGAAGAAGTCCGGTGCTTTCAGT<br/> CTGAAGAGGCTGCTGAGTATATGAAGATCGGAACCTTGAACCGTCTGTTGCTGTTGGGTAGATCCATTGGTTTCATT<br/> GCCCACCACCTGGACCAGAAGAGATTGAAGCAACCACTGACAGACACCCAGTACGACATTTTCATCCAGCCA<br/> TTCAACACCGACAGAATCTTGGTCCAGCAGAGACAGTAA</p> |
| <i>MmME</i>  | <p>ATGGAACCTAGAGCACCAAGAAGAAGGCACACTACCCAAAGAGGTTACCTGTTGACTAGAGATCCACACCTGAA<br/> CAAGGACTTGGCTTTCACCTTGAAGAGAGACAGCAGTTGAACATCCACGGTTTGTGGCCACCATGCATCATCTCC<br/> CAAGAGTTGCAGGTCTGAGAATCATCAAGAACTTCGAGAGACTGAACTCCGACTTCGACAGATACTTGTGTTGA<br/> TGGACCTGCAGGACAGAAACGAGAAGTTGTTCTACTCCGCTTGTATGTCCGACGTCGAGAAGTTCATGCCAATCGT<br/> TTAACTCCAACCGTTGGTTTGGCTTGTGAGCAATACTCTGCGCTTCAGAAAGCCTAGAGGTCTGTTCAATTTCCAT<br/> CCACGACAAGGGTCACATTGCCTCTGTTTTGAACGCTTGGCCAGAGGACGTTGTTAAGGCTATCGTTGTTACTGACG<br/> GCGAGAGAATCCTTGGTTTGGGTGATTGGGTGCAACGGTATGGGTATTCCAGTTGGAAGTTGGCCTTGTACACT<br/> GCCTGTGGTGGTGTTAACCACAGCAGTGTTGCCAATCACTTTGGACGTTGGTACTGAGAACGAGGAATTGCTGA<br/> AGGACCCACTGTACATCGGTCTGAGACACAGAAGAGTTAGAGGTCCAGAATACGACGCTTTCCTGGACGAGTTTA</p>                                                                                                                                                                                                                                                                                                                                                                                                                                                                                                                                                                                                                                                                                                                                                                                                                                                                                                                                                                                                                                                                                                                                                                                                                                                                                                                                                                                                                                                                                                                                                                                                                                                                                                                                                                                                                                                                                                                                                                                                                                                                                                                                                                                                                                                                                                                                                                                                                                                                                                                                                                                                                                                                                                                                                                                                                                                                                                                                                                                                                                                                                                                          |



|              |                                                                                                                                                                                                                                                                                                                                                                                                                                                                                                                                                                                                                                                                                                                                                                                                                                                                                                                                                                                                                                                                                                                                                                                                                                                                                                                                                                                                                                                                                                                                                                                                                                                                                                                                                                                                                                                                                                                                                                                                                                                                                                                                                                                                                                                                                                                                                                                                                                                                                                                                                                                                                                                                                                                                            |
|--------------|--------------------------------------------------------------------------------------------------------------------------------------------------------------------------------------------------------------------------------------------------------------------------------------------------------------------------------------------------------------------------------------------------------------------------------------------------------------------------------------------------------------------------------------------------------------------------------------------------------------------------------------------------------------------------------------------------------------------------------------------------------------------------------------------------------------------------------------------------------------------------------------------------------------------------------------------------------------------------------------------------------------------------------------------------------------------------------------------------------------------------------------------------------------------------------------------------------------------------------------------------------------------------------------------------------------------------------------------------------------------------------------------------------------------------------------------------------------------------------------------------------------------------------------------------------------------------------------------------------------------------------------------------------------------------------------------------------------------------------------------------------------------------------------------------------------------------------------------------------------------------------------------------------------------------------------------------------------------------------------------------------------------------------------------------------------------------------------------------------------------------------------------------------------------------------------------------------------------------------------------------------------------------------------------------------------------------------------------------------------------------------------------------------------------------------------------------------------------------------------------------------------------------------------------------------------------------------------------------------------------------------------------------------------------------------------------------------------------------------------------|
| <i>CaGDH</i> | <p>TGGAAGCTGCTTCTTCCAAGTACGGTATGAACTGCTTGATCCAGTTCGAGGACTTCGCTAACAGAAACGCCTTCAG<br/> ACTGCTGAACAAGTACAGAAACAAGTACTGCACCTTCAACGACGATATCCAGGGTACTGCTTCTGTTGCTGTTGCT<br/> GGTTTGTGGCTGCTTTGAGGATCACCAAGAACAAGTTGTCCGACCAGACCGTCTTGTTCGAAGGTGCTGGTGAAG<br/> CTGCATTGGGTATCGCTCATTGGTTGTGATGGCCATGGAAAAAGAGGGTCTGTCCAAAGAGAACGCCAGAAAGA<br/> AGATCTGGTTGGTCGACTCCAAGGGTTTGATCGTTAAGGGTAGAGCTTCCCTGACCGAAGAGAAAGAAGTTTTCGC<br/> TCACGAGCACGAAGAGATGAAGAACTTGAAGCCATCGTCCAGAAGATCAAGCCAACTGCTTTGATCGGTGTTGC<br/> TGCTATTGGTGGTGCTTTCACCTGAGCAGATCTTGAAGGATATGGCCGCTTCAACGAGAGGCCAATCATCTTCGCTT<br/> TGTCTAACCCAACTTCCAAGGCTGAGTGTTCGCTGAGCAATGTTACAAGGTTACTAAGGGTCGTGCTATCTTCGCC<br/> TCTGGTTCTCCATTTGACCCAGTTACTTTGCCAGACGGTAGAACTTTGTTCACAGGTCAAGGTAACAACCTCCTACGT<br/> TTTCCCAGGTGTTGCCTTGGGTGTTGTTGCTTGTGGTTTGAGACACATTGACGACAAGGTGTTCTTGACTACCGCTGA<br/> GGTTATTTCCCAACAGGTTTCCGACAAGCACTTGCAAGAAGGTAGACTGTACCCACCACTGAACACCATCAGAGG<br/> TGTTTCTTGAAGATCGCCGTCAAGATCGTTCAGGACGCCTACAAAGAAAAGATGGCCACTGTTTACCCAGAGCCA<br/> CAGAACAAAGAAGAGTTCGTTTCTTCCAGATGTACTCCACCAACTACGACCAAATCTTGCCAGACTGTTACCCAT<br/> GGCCAGCTGAGGTTCAAAAGATCCAGACTAAGGTTAACCAG</p>                                                                                                                                                                                                                                                                                                                                                                                                                                                                                                                                                                                                                                                                                                                                                                                                                                                                                                                                                                                                                                                                                                                                                                                                                                                                                                                                                                                                                                                                                                                                                                                    |
|              | <p>ATGTTTCGAGAACATCTCCTCCAACGGTGTCTACAAGAACCTGTTTCGATGGAAAGTGGGTTGAGTCCAAGACCAAC<br/> AAGACTATCGAAACTACTCCCCATACGACGGTTCCTTGATTGGTAAGGTTACGGCCTTGTCCAAAGAAGAGGTTG<br/> ACGAGATTTTCAAAGTCTCCAGAACTGCCAAAAGAAAGTGGGAGAAACTCCAATCAACGAGAGGGCCAGAATC<br/> ATGAGAAAAGGCTGCTGATATCTTGACGACAAACGCTGAGTACATTGCCAAGATTCTGTCCAACGAGATCGCCAAG<br/> GATCTGAAGTCTCTTTGTCCGAGGTTAAGAGAACTGCCGACTTCATCAGATTCACTGCCAACGAAGGTACTCACA<br/> TGGAAGGTGAGGCTATCAACTCTGACAACTTCCAGGTTCCAAGAAGGACAAGTTGTCCCTGGTTGAGAGAGTCCC<br/> ATTGGGTATCGTTTTGGCTATCTCCCCATTCAACTACCCAGTTAACTTGTCGGTTCCAAGGTTGCTCCAGCTTTGAT<br/> TGCTGGTAACTCCGTGTTTTGAAGCCATCCACTACTGGTGCTATTTCCGCCTTGCAATTGGCCGAAATTTTCAACGC<br/> TGCTGGTTTGCCAGCTGGTGTGTTTGAACACTGTTACTGGTAAGGGTTCGAGATCGGTGACTACTTGATTACCCACG<br/> AAGAGGTCAACTTCATCAACTTTACTGGTTCCTCCGCCGTCGGTAAGCACATTTCTAAGATCGCTGGTATGATCCCC<br/> ATGGTGTGGAACTTGGTGGTAAGGATGCTGCTATTGTCTTGAGGACGCTAACTTGGAGACTACTGCTAAGTCTAT<br/> CGTTCCGGTGCTTACGGTTACTCCGGTCAAAGATGTACTGCCGTTAAGCGTGTCTGGTCAATGGATAAAGTTGCCG<br/> ACGAATTGGTTGAGCTGGTCACCAAGAAGGTCAAAGAGTTGAAGGTCGGTAACCCATTTCGACGACGTTACTATCA<br/> CTCCACTGATCGACAACAAGGCTGCCGACTACGTTGACACTTTGATTGACGACGCTATCGAGAAGGGTGCCACTTT<br/> GATCGTTGGTAACAAGAGAAAAAGAAACCTGATGTACCCACCTTGTTTCGACAACGTCACCTGCTGACATGAGAAT<br/> CGCTTGGGAAGAACCATTGGTCCAGTCTTGCCAATCATCAGAGTCAAGTCTATGGACGAGGCTATTGAGCTGGCT<br/> AACAGATCTGAGTACGGTCTGCAATCCGCTGTTTTCACTGAGAACATGCACGACGCTTTCTACATTGCTAACAAGC<br/> TGGACGTTGGTACTGTCCAGGTTAACAACAAGCCAGAAAGAGGTCCAGATCACTTCCCATCTTGGGTACTAAGTC<br/> CTCCCGTATGGGTACTCAGGGTATCAGATACTCCATCGAGGCTATGACTAGACACAAGTCCATCGTCTTGAACTTG<br/> TAA</p>                                                                                                                                                                                                                                                                                                                                                                                                                                                                                                                                                                                                                                                                                                                                                                                                                                                                                                                                                                                                                                                                                                               |
| <i>BaFAS</i> | <p>ATGACCATCGGTATCTCCAACCACAGACTGGTCAACAGATTGGAGTCTGAGAAGTTGCGCTTGTCCTTCTCAGGTC<br/> AAGGTTTCTCTGGCTGCCAACCTTGAGAAGTGTATCGTGGTGGTAACGGTGCTCAAGTTGCTGGTGCTGTTGAT<br/> GCTGCTGGTAAGTTGTTGGAACCAAGTTGCTGACGAATTGGTTGCTGCTTTGCCACACGGTTTCGATCGCAAGTTGAATG<br/> GGCTGGTAACGCTGAAGATCCAGCTTGGGATTTGTCTGACTCCTCCATTTCTACCCAGGTATCGTTGTTGCTCAGT<br/> ACGGTTTGATCGAGTCTTGAAGGCTCAAGGTTTGGACCCAGCTGATGCTGTTGCTCATATTGGTCACTCTCAAGGT<br/> GCTCTGGCTACTTACATTTCTTCCGGTAGAGCACAAAGTCTGCTGAGGTTATTGCTTTGGCTCAGTTGATCGGTGTTGCC<br/> ATCTCTAAGACTGCTAGAGCCACTGGTTTGATCAGAATCGTCTGCTGTTCTCCAATGGTTTCCATTGCCGGTATTTCC<br/> AGAGAGCAGTTGGCTAAGGTTTTGGCCAAGACTGGTGTGACTCCGTTATCGGTCTGCAAAACAACCACAACACCT<br/> TCGTTGTTACTGGTTCCTCCAGAGGACAACAACAAGGTTATTGAGGCCATCGAGAAGTTGGCTGCTAAGGACGCTAA<br/> GGCTATCGAGAACAAAGAAAGAGGTGGTAACCCATTTCGCTCCAAGAATCAACGCTTTGCCAGTTCAATCCGGATA<br/> CCACCATCCAAGATGTCTGCTGCTGTTGAGATGGTTACTTCTGGGCTGAGAGAAATCGGTTTGGATAAAGGATTTG<br/> GCTCAGCAGGGTGCTGAGGCTGTTTGACTGAAATCGTTAACTGGCCAGCTACTGTTCACTGCTGCCGTAGATGCTGG<br/> TGTTACTGGATTTTGAATGCGGTCCAGAGAAAGGTAAGGTTGCTTGGTACTAAGGCTGTTGTTGCTGGTCAAGGTA<br/> TCGGTGTTCAAGGTTGTTTCTACTGACGAAGGTCAAGCTGCCTTGTTTCGATGTTGGTCAAGCTCCAGAATTGCCAGTC<br/> AACTTCGCTCAATTGCCCCAAAGGTTTTTCGACGACAAGGGTAAGACTAGACTGTCCACTAGATTACCCGAGTTGA<br/> CCGGTACTCCCCAGTTGTTTTGGCTGGTATGACTCCATCTACTGTTGACCCCTGCTATCGTTGCTGCTGCTGCAAATG<br/> CTGGTTTTTGGGCTGAATTGGCTGGTGGTGGTCAAGTTACTGACGCTATTTTGAACGACTCCTTGGAGAGATTGGAG<br/> GACATGTTGAACCCAGGTATTAACGCTCAGTTCAACGCCATGTACTTGTCCCCAAAACAATGGCGTGCTCAGATCG<br/> AGGGTAGAAGATTGATTCCAAGAGCCAGAGCTAACGGTGCCTCCATTAACGGTGTTATTTGTTCCGCTGGTATCCC<br/> ACCACACGAAGAAGCTATCGCTTTGGTCAGACAACCTGCAAGAGGATAACATCCCTTGGGTGCTTTTAAAGCCAGGT<br/> GCCGTTAGACACGTTACCAGGTTCTTGCTATTGCCGATGATTGGCAGACACCACCGTTATCATGCAGGTTGAAGG<br/> TGTTAAAGCTGGTGGTCACTACTCTGGGAAGATTGTCTCTTTGCTGACTGAGACTACGCCGACATTAGAGAG<br/> AGAGACAACGTCGTTTTGATGGTGCCGGTGATTGGTGCTCCAGAGAGAGGTGCTCAATACTTGCTGCTGGTGAAT<br/> GGTCCAAGGTCTACGGTTTGCCAGCTATGCCAGTTGACGCTATCATGATTGGTACTGCTGCTATGGTACCAAAAGA<br/> GTCCACTGCTTCTGAATCCGTTAAGCAGGCTTTGGTTGCTACCAAGGTCTTGAGGATATTCCAGGTGGTGGTTGGG<br/> TTCCAGCCGGTGGTGTAGAGATGGTATTGCTTCTGGTAGATCCCAGTTGGGTGCTGACATTACGAGATCGATAA<br/> CACTTTTGCTAAGGCCGGTAGATTGCTGGATGAAGTTGCCGGTGATGCAGATGCAGTTGCTGCTAGAAGAGAAGAG<br/> ATTATCGCCGTGATTGCTGGTACTGCCAAGCCATACTTCGGTGACATTAACGCTATGACCTACGCTGAGTGGTTGGC<br/> CAGATACGTTGAAGTTTCTACATGGGTTCTTGGGTTGACTTCTCTGGGCTAGAAGATTTCGAGCAGATGATTGCTA<br/> GAGCTGAGGCCAGATTGACTGAAGCTGATACGGTGAGTTACCCCATTTGGTTACTGTGCTGCTGAACATCCAGA<br/> GAGGGCTATTGCTGACGTTGTTGCAGCTTATCCTGCTGCTGAAAAGCACACTGTTATTGCCTCTGACGAAGCCTGGT<br/> TCGTTGACTTGTTGAGAGGTAACGGTAAGCCACCAGCCTTCGTTCCAGTTATTGATTCCGACGTTAGAAGATGGTGG</p> |

CGTCAAGACTCTTTGTGGCAAGCTCATGACGAGAGATACTGCTGAGCAGGTTGGTATTATCCCAGGTACTIONG  
CCGTTGCTGGTATCACTAAGGCTAACGAACCTGTTGCAGAGTTGTTGGCTAGATTGCAAGCTGCTGCCGTTGAACA  
AGCCTTGCAATCTGAAGATACTGAGAAGGCTGAACTGGCTAACTCCGCTTTGGAAAGAGTTTTGGCAGCTCCTTCT  
GTTGAGTGGGCAGGTAGACAAAGACCAAATCCAGTTGCTCAGGTTTCCGAGTCTTGGACTGTTGACTCTCAAGCTA  
AGACCGCTTCTACTGAAGGTGCTGAGTTGGTTACTATTGACGAGCACACCGTTGAGTTGTCCGTTGCTTTGACAGGT  
TCTGTTCCAGGTGCTACCTTGCAACTGCAAATCACTGTTCTGCTGACGCTCCATTGTCCGCTACTCCAATTATTACT  
GCTCAGGCTGCCGAAGAATCTATGGCAGCTTAGCAGCTGTAGCTGCTGGTGGAACCTTGGCAGAGGTTACTGATG  
GAACTGCCGTTTGGAAACTACTTTGGACTCCGCTGCTTTGTCCGACTATGCCGGTGTAACCTCTGGTTACTTGGCTT  
CCGCTGACACCAACTCTGCTATTGCTCCAGATGTTATCGTTGGTAGAGCTTGGCCAGCTGTTTTCGCTGTCATTGCCA  
ATTCCGTTATTCTGGTTCCGACTCCGCTTGGTTGTTGAGGGTTTGTGAACTTGGTCCACTTGGAAACACGACGTGA  
GATTGCATCAGGCTTTGCCAACAGAAGCTGTTGACTTGACTGTTACCGCTAGAGGTGGTGAGGTTAGAGATACTGC  
TTTGGGTAGAGTTGTCGAGGTGCTGTTGATATTGCTATCGCTGAAGCCGAGGATACCGTTTTGGCTACCTGAAAG  
AGAGATTGCCATCGTCGGTAGAACTGGTGAGCAAGAATTGGAACCTGCTACTTCTACTGCCGAGATTACCAATAC  
TCCAGCCTCCTTCAGACACCAGTTGAGAGTTACTGCTCCAGCTTCTATGCACCTTTTCGCTGTTGTTACCGGTGACA  
GAAACCAATTCACGTTAGTGCTGCCGCTGCTAGATTGGCAGGATTGGAAAATGGTGTTATCGTCCACGGTATGTG  
GACTTCCGCTATTGGTCAATTGGCCGCTGGTTTCGATGGTTTGGAAATGGTCCGCTAACATGTTGTCTC  
CAGTTTTGCCAGGTGCTGAAGTCACCTTCATCGTTGAAAGAACCGGTGTCGATTCCAGACCAGGTAGAGGTGAAGT  
TAGAACCGTTACTGCTTCCGTTGGTGATGACGTTGTTGCAAGCTACTGCTACAATGGCTGCCCCAAGAACTTTTT  
ACGGTTTTCCAGGTACGGGTATTAGTCCCAAGGTATGGGTATGGAATCCTACGCTTCTTCATCTGCTGCCAGAGAA  
GTTTGGGAAAGAGCTGACGCACACACTAGAGAAAAGCTGGGTTTCTCCATCTTGGAGATCGTCAGAAACAATCCA  
CCACTGGTTGTTGTGGACGGTGAAGAGTTTACTACCCAGACGGTACTTGTCTTGACCCAGTTTACCCAAGTTGC  
TATGGCCACTTTGGGTTGTGCTCAAATTGCCGAGTTGGCTGAAGCTGGTGCAAGTCTCAAGACACTTACTTCGCTG  
GACACTCTGTCGGTGAGTATAACGCTTTGGCTGCTACGCTCAAGTCTTGTCTTTGGAAGCCGTTGTCGAGATCGTTT  
ACGCTAGAGGATTGACCATGCACAGATTGGTTGACAGAGATGCTGAGGGTAACTCCAACCTACGGATTGGCTGCTGT  
TAGACCAAACAAGATCGGTATTAGAGCCGAGGACGTTTTCGACTACGTTGCCCAAGTTTTCTAAACCAGAGGTGA  
GTTCTGGAAATCGTCAACTACAACATTGCTGGTGCCAGTACGCTGTTGCTGGAAGTATAGAGCTGGTTGGCTGCAT  
TAGCTGCTGATGCAGAATCTAGAGCACCAAGGTATGAGATCCTTCATCATGATCCCTGGTATCGACGTTCCATTCCAC  
TCTTCTCATTTGCTTGGTGGTGTTGGACAACCTCAGAACCCACTTGGATATGTTGATCCCAGACGACGTTGACCTGGA  
CATTTTGAGAGGTGCTTACATCCCTAACTTGGTCGCTAGACCATTGAGTTGACTCGTGAGTTGCTTGAAGCTATGG  
CCGATGTTGTTGATTCCACCTACGTCACGACATCTTGGCTGATTTGACAAGGCTACTGATGATCCCGCTAAGATG  
GGTAGAACTTTGTTGATCGAATTGCTGGCCTGGCAGTTGCTTCTCCAGTTAGATGGATTGAGACTCAGGACTTGT  
GCTGCTGCTCCATCTGTTCTGCTGGTGACGTTACAGCTGGATTGGGTGTTGAAAGATTTCGTTGAGATTGGTGTCG  
GTTCTTCCCCAACTTTGGCAAACATGTTGGGTGACACCTTGAGATTGCCTCAATACGCTGGTAACCTATCGAGGTT  
TTGAACGTTGAGAGAGATAGAGCCACCGTTTTGCTGAGGATGCCTTGGAAAGACCTGTTGAGGATTCTTCTGAGT  
CCTCTACCGGTGTTGCTGAAGCAGCTACTGCAACAGCTGAAGAAGTTCCCAAGCTAACGCAGCTCCAGCAGCTGC  
ACCAGAGCAAGTTGTTGCACAACCAGCTACTCCCGCTCCTGCCCGGTGGAACTACCCAGATGATAAGGCTTTT  
TCTGCTGCCGACGCTACCGAGATGTTGATTGCTATTTGGACCAAGGTGACACCAGACCAAATGGGTGCTGCTGACA  
CTATTGAACTGTTGGTTGAGGGTGCTCTCTCCAGAAGAAATCAGTTGTTGTTGGACCTGGGTGTCGAGTTTGGTTG  
GGTGCTATTGAAGGTGCCCACGCTGAAATTTCTGCCCTGAAAGAACAAGTTCCGGTATGGCCAAGGGTTACAAGG  
CTTTTGGTCTGTTTGTCCGCTCAGGTTGCTGAATCCTTGAGAAGGTTGACTGGTCCAGCTGGTAAGAAGCCAGCT  
TACATTGCTCAGAGAGTTGCCGATACTTGGGGTTTAGGTGCTGGATGGGTTGATAGAGTTACAGCTGAACTTGCTT  
GGGTGCAAGAGAAGGTGCTTCTTACGTTGGTGATTGGCTTATTGGCTCCAGCTAACCTGCTACTACAGCCG  
AATTGGATGCTTTGATTGATGCCGCTGTAGACGCAGCTGGTGCTAAGGTTGGAATCGTTATTTCTAAGCCATCCGCT  
TCCGGTGCTGCTCAAGGTGGTGAGTTGATTACGCTGCTTTGGACGCTTACTCCGAGAAGATGAACTCAGCTTTGGC  
TAACACTGCCAGAACTTTGCTGCTCAATTGGGTGACGAAGCCCCAACTACTGAGTTTCTGAGGCTGATGATAAC  
GCCGCTGTGGTTGATTGGTTACCTCTGAATTGGGAGCTGACTGGCCTAGATTGGTTTCCCCACTCTTGTATGCTGAC  
AAGACCGTTCAATTGGACGACAGATGGGCTTCTGCTAGAGAGGACTTGGTTAGATTGCTCTTGGGTGAGATCGAGG  
ATTTGGACATTACTGGTGCTGGTGAAGAGGCAGCTGCAATGGCAACTTACTTGGGTCTTGATGAGCAAGCTGCCCCA  
AGCTAGAGTTGCTGCATCCACTTTGGATCATGACGGTGAGGTTGCTGTTGTCACTGGTGGATCTCCAGGTTCTATTG  
CTTCCGAGATTGTCGCCAACTTGCTTAGAGAGGGTGCTACCGTTATTGCTACCCTTCCAGATTGGGTACGACAGG  
TTGGAGTTCTACAAGAACTTGACAGAACCTCCAGACGTGGTAACGCCCAATTGTGGATCGTTCTGCTAACTTGA  
ACTCCTTCGCTGATCTGGACGCTTTGATCGATTGGATCGGTACTGAACAGACCGTTACCGTTGGTGCTTCTTCAAG  
TTGGTTAAGCCAGCATTTGGTCCCAACTCTGTTGTTTCCATTGCTGCTCCAAGAGTCCAGGGTACTTTAGCTGACGCT  
GGTGCTCCTGCTGAAGCCCAATGAGATTGCTTTGTGGTCCGTCGAAAAGTTGATCGCTGGTTTGTCTCAGCTTGG  
TACTGGTACTACGTTGGTCAGAGATTGCACATCGTTTTCCTGGCTCTCCAAACAGAGGTTAGATTCCGTTGGTGATG  
GTGCTTACGGTGAATCCAAGGCTGCTTGTGATGCTTTTGGTTACAAGATGGCAGCTGAACCAAGTTTGGGGTGCTAG  
AACTTCTATCGTTACGCTCATATCGGTTGGGTTAGAGGAACTGGATTGATGGGTGGAACGACCCCTTGGTTGAC  
GCTGTTGAGGCTAAGGGTGTTAGAACCTTCTCCACTGAAGAGATGGCTTCCCAATTGGTTGGTGAAGGTGCATCTA  
CCTCCAAGCGTGATGCAGCAGCTCATGCTCCAGTTACATTGGATCTTACTGGTGGTTTGGGAGAAGCCGACATCAA  
CTTGCCAGAATTGGCTAGGTCTGTTCCGTTCAACCTGTGGCTGAAGATGTTGAAGAGGTTGCTTCTTGGAGAGCCC  
TGCCAAACATCAGAGAAAAGATCGAGTGGAATACCCAGATTCGCGCGTGTTAATCAAAAGCTGGACGACATGG  
TTGTCATCGTTGGTGCCGTTGAAATTGGACAGTTGGTTCCCTCTAGAACCAGATTGAGGTTGAAATGACCGGTGA  
TTTACTGCCGCTGGTGCTGTTGAATTGGCATGGACTACAGGTTTGAATTGCTTGGGATGACGCTTCTGGTGCTTGGTT  
TGATGCCGAAGGTGAAGAGATTGCTGAAGAGGACATCTACGACAGATTCCACGACGAAGTCTTGGCTAACGTTGG  
TGTGAGAAAGTACCACGATGACTACGGTCTAAGATGCCAATGGTTGACAACCTGGCTCCTGAGCTGACCACTATC  
TATTTGGAGAGGGACATGACTTTCGCCGTTGCCGACGAAGAACTGCTAGAACATTGCTGCTGATGTCGAGGGTG

CCACTGCTCATTTTGATGGTGAAGAATGGCAGGTTACTAGACCAGCTGGCGCAGAAAGTTAGAGTTCCTAGAAAGAGT  
TGCCATGACCAGATTTGTCGGTGGTCAAATTCCACAGGGTTTGACCCAGGTGTTACGGTATCCCAGCTGACATGA  
TTGACAACCTGGACAGAGTTGCCTTGCGAACCTTGCTGTACCGTTGATGCATTTCTGGCAGCCGGTTTTTCACCA  
GCTGAATTGCTAGCTCATGTTACCCAGCCAGAGTCTCTTCCACTCAAGGTACTGGAATGGGTGGTATGCAATCCA  
TGAGATCCCTGTACTTGGACAAGTTGTTGCGTCAGCCTAGACCTAACGACATTCTGCAAGAAGCCTTGCCAAACGT  
TGTCGCTGCTCACGTTATGCAGTCTTACGTTGGTGGATACGGTCAGATGGTTCATCCAGTCGCTGCTTGTGCTACAG  
CAGCTGTTTCGTGTTGAAGAAGGTATGGACAAGCTGAGGTTGAGAAAGGCTGACTTTGTGTTGCCGGCGGTATCGA  
TGACTTGTCCATTGAAGGTATCACCGGTTTCGGTGATATGGCCGCTACTGCTGATTCTGGTGAAATGGAAGCTAAG  
GGCATCGACCACAAGTACTTCTCTAGAGCCAACGACAGAAGAAGAGGCGGTTTCATTGAATCCGAAGGTGGTGG  
ACCATCTTGCTGGCTAGAGGTTTATTAGCAGCAGAATTGGGTCTGCCAGTTCTGGGTGTTGTTGGTTTCGCTGAATC  
TTTTGCTGATGGTGGCCACACCTCTATTCCAGCTCCAGGTCTTGAGCTTGTGCTAGAGGCGGAGCTGATT  
CAAGATTGGCACAAGGATTGGCAGAACTGGGTGTTCCGCTAACGAGATCGCTGTTATTTCCAAGCACGACACTTC  
CACTAACGCCAACGATCCAAACGAATCTGACCTGCACGAAAGAATTGCTGCCTCTATGGGTAGAGATGCAGGTAA  
CCCTTTGTTTCATCATCTCCAAAAGACCCTGACTGGTCACGCAAAAAGGTGGTGCAGCCGCTTTTCAATTGGTCGGTT  
TGACTCAGGTTCTGAGAAACGGTGTTTGGCCACCAACAGATCCTTGGATTGTGTTGACCCAGCCTTGAGACAACA  
CACTCACTTGACCTGGTTGAGAGAACAGTTGGACTTGAGAGCTACTCCACCAAGGCAGGTTTGGTCACTTCTCTT  
GGTTTCGGTCACGTTTCTGCCTGGTTGCCGTTGCTTTCATCCTGGTGCAATTTGTTGAAGCTCTGAGAGCTGAAAGAGGC  
GCAGAGGCTGCTGCTCAGTGGCAACAATCTGCTAATGCTAGAGAAGCTGCCGGATTGCAGAGATTGACTTCTGCTA  
TTTCTGGTGGTCCAGCCTTGTACGAACGTCCTGTTGATAGAAATCTTGGTGGCACTGGTGACGTCGTCAAAGAGAG  
AGAAGCAGCCGTTTTGTTGGACGATGGTGCAGCAGCCAGATCAAGACCAAGAGCTGAACACTTCAGAAGGATCAG  
AAAGGCCGCTGTTGCTTGGACAACAGAGAAGCTATGACCGTCGGTGTTGATCTGGTTCACATTCCAGCTTTGCCAT  
CCAAGTGTAGAGCTTTGGTGAGACTGCTGTCCAAGTGTTCAGACGTTGGAACGTTGTCATGTTGAAGCGTGCTGTT  
ACCTTGAGAGAATGTTGAGAATCAGAGCCCTGAGAGTTCACGGTTTGTCTACATGGTTAGGTGGTGGCAGACAAA  
AGAAGAGATCCTCTCGTAGAGGTAGGAAGAGATCAACTGCTTCCACCAATAA

ATGGAAGAGGTTGTTATCGCTGGTATGTCCGGTAAGTTGCCAGAATCCGAAAACCTGCAAGAGTTCCTGGGACAACT  
TGATCGGTGGTGTGACATGGTTACTGACGACGACAGAAGATGGAAGGCTGGTCTTTACGGTTTGCCAAAGATGAC  
CGGAAAGTTGAAGGACCTGTCCAGATTGCGACGCTTCTTTTTCGGTGTTACCCAAAGCAAGCTCACACTATGGAC  
CCACAATTGAGATTGCTGTTGGAGGTTACTTACGAGGCCATCGTTGACGGTGGTATTAACCCAGATTCTTGAGAG  
GTACTCACACTGGTGTGTTGGGTGGTGTCTGTTCTGAAACTTCCGAGGCCCTGTCCAGAGATCCAGAACTTTG  
GTTGGTTACTCCATGGTTGGTTGTCAGAGGGCTATGATGGCTAACAGACTGTCATTCTTCTCGACTTCCGTGGTCCA  
TCCATTGCTTTGGATACTGCTTGTCTCTTCTTCTGATGGCCTTGCAAAACGCTTACCAGGCTATTCACTCTGGTCAA  
TGTCAGCTGCTATCGTCGGAGGTATCAACGTTTTGTTGAAGCCAAACACCTCCGTCCAGTCTTGAGATTGGGTAT  
GTTGCTCCAGAGGGTACTTGTAAGGCTTTCGACACTGCTGGTAACGGTACTGTAGATCCGAAGGTGTTGTTGCCG  
TCTTGTGACCAAGAAGTCTTGGCCAGAAGAGTTTACGCCACTATCTTGAACGCTGGCACTAACACCGACGGTTT  
CAAAGAACAGGGGTGTCATTTCCATCCGGTGACATTCAAGAGCAGTTGATCAGATCCTTGTACCAGTCTGCTGGT  
GTTGCTCCAGAACTCTCGAGTACATTGAAGCTACGGTACTGGTACTAAGTCCGTGATCCACAAGAGTTGAACG  
GTATCACTAGAGCTTTGTGCGCTACCAGACAAGAGCCTTGTGATCGGTTCCACCAAGTCTAACATGGGTCTATCC  
AGAACCAGCTTCCGGTTTGGCTGCTTTGGCTAAGGTTTTGTTGTCTTTGGAGCACGGTTTGTGGGCTCCAACTTGC  
ATTTCCACTCTCCAAATCCTGAGATCCAGCTTTGTTGGACGGTAGATTGCAGGTTGTTGATCAGCCATTGCCAGTC  
AGAGGTGGTAACGTTGGTATCAACTCTTTCGGTTTTCGGTGGTTCCAACGTCCACATTATCTTGCCTCCAAACACTCA  
ACCACCACAGCTCCAGCTCCACATGCTACTTTACCAAGATTGCTGAGAGCCTCCGGTAGAACTCCAGAAGCTGTT  
CAAAAGTTGTTGGAGCAGGGATTGAGACACTCTCAGGACTTGGCTTTCTGTCCATGTTGAACGACATTGCTGCTGT  
TCCAGCTACTGCCATGCCTTTTAGAGGTTACGCTGTTCTTGGTGGTGAAAGAGGTGGTCCAGAGGTTCAACAAGTTC  
CAGCCGGTGAAAGACCATTGTGGTTCAATTTGTTCCGGTATGGGTACTCAGTGGCGTGGTATGGGTTTGTCTTGATG  
AGACTGGACAGATTGAGAGACTCCATCTTGAGATCCGACAGGCTGTTAAGCCATTCCGTTTGAAGGTTTCCCACT  
TGTGTTGTCCACTGACGAGTCTACTTTCGACGACATCGTCCACTTCTTTCCTTCCCTGACTGCTATCCAGATCGGTTT  
GATCGACTTGTTGCTGCTGATGGGTCTAGACCAGATGGTATCGTTGGTCACTCTTGGGTGAAGTTGCTTGTGTTA  
TGCTGACGGTTGTCTGTCTCAAGAAGAGGCTGTTTTGGCTGCCTATTGGAGAGGTGAGTATCAAAGAGGCTCAC  
TTGCCACCAGGTGCTATGGCTGCTGTTGGTTTGTCTTGGGAAGAGTGTAAGCAGAGATGTCCACCTGGTGTGCTTCC  
AGCTTGTCACTCTAAGGACACTGTTACTATCTCCGGTCCACAGGCTCCAGTTTTCGAGTTCTGTTGAGCAACTGA  
GAAAAGAGGGTGTTTTCGCCAAAGAGGTTAGAACAGGCGGTATGGCTTTTCACTCCTACTTCATGGAAGCTATCGC  
CCCACCTTTGTTGCAAGAGCTGAAGAAGGTATCAGAGAGCCAAAGCCAAGATCCGCTAGATGGTTGTCTACTTCC  
ATTCCAGAGGCTCAATGGCATTCTTCTTGGCTCGTACTTCTTCCGCTGAGTACAACGTCAACAACCTTGGTTTCCCC  
AGTCTTGTTCGAAGAGGCTTTGTGGCATGTTCCAGAGCACGCTGTTGTTTTGGAAATTGCTCCACACGCTCTGTGTC  
AGGCCGTTTTGAAGAGAGGTTTGAAGCCATCTGCTACTATCCCACTGATGAAGAAGGACCACAGAGACAACCT  
TGGAGTTCTTCTCGCTGTTATTGGTAGACTGCTGTTCCGTTATTGACGTAATGCCAAACGCTTTGTTCCCACTA  
GTTGAATTTCCAGCTCCTAGAGGAACCTCATTGATCTCCCATGATTAAAGTGGGACCACTTTTGGCTTGGGATGT  
TCCTGCTGCTGAAGATTTCCCAAACGGATCTGGTTCTCCATCCGCTGCCATCTACAATATTGACACTTCTTCTGAGTC  
CCCAGACCACTACTTGGTTGATCACACTTTGGACGGTCGTGTTTTGTTCCCTGCTACTGGTTACTTGTCCATCGTCTG  
GAAAACCTGCTGCTAGAGCACTTGGTTTGGGTGTTGAGCAATTGCCAGTTGTTTTCGAGGACGTTGTCTTGCACCAGG  
CTACTATCTTGCCAAAGACCGTACTGTTTCTTGGAGGTTGTTTGTGAGGCTTCCAGAGCTTTCGAAGTTTCCG  
AGAACGGTAACCTTGTTGTCTCCGGTAAGGTTTACCAATGGGACGATCCAGATCCAAAGACTGTTTCGATCATCCAGA  
GTCTCCAACCTCTAATCCAACCTGAGCCACTGTTTTTGGCTCAGGCCGAAGTCTACAAAGAGCTGAGATTGAGAGGA  
TACGACTACGGTCCACACTTCCAGGATTTTGGAGGCATCTTGGAGGTGATTCCGGTAGACTGTTGTGGAAGG  
ACAACCTGGGTTTCTTTCATGGACACCATGTTGCAGATGCCATCTTGGGTTCTGTAAGCACGGTCTGTACTTGCCA  
ACTAGAGTTACTGCCATTACATCGACCCAGTACTCACAGACAGAAGTTGTACACCTTGCAGGATAAGGCTCAG

hFAS

TAGAGAGGGTTAA

ATGTTGGACAACAGAGAAGCCATGACCGTTGGTGTGTGACTTGGTCCACATTCCAGGTTTCGCTGAGCAATTGTCTA  
GACCAGGTTCCACTTTCGAGCAAGTGTTCTCTCCATTGGAAAGAAGGCACGCTCAGACTAGAAGAGATGCTGCTGC  
TGACGCTACCAACTCTTCATTGGCTGGATCTAGAACTGAGCACTTGGCTGGTAGATGGGCTGCTAAAGAGGCTTTC  
ATTAAGGCTTGGTCCCAGGCCATCTACGGTAAGCCACCAGTTATTGAACCAGACTTGGTTAACTTCGCCGAGATCG  
AAGTTTTGCCAGACAGATGGGGTAGAGTTGCCTTGCAATTGAAGGGTGAAGTTGCCGCTAAGCTGCAAGAATCCAT  
TGGTGACGTTGAGTTGGCCTTGCTATTCTCACGATGGTGACTACGCTACTGCCCAGTGTTGTGTGAGATACCAGA  
GATGA

ATGGCAATATTAGGTTTAGGCACGGATATTGTGGAGATCGCTCGCATCGAAGCGTGATCGCCCGATCCGGTGATC  
GCCTGGCACGCCGCGTATTAAGCGATAACGAATGGGCTATCTGGAAAAACGCCACCACGACCGGTCGGTTTTCTGG

|                                 |                                                                                                                                                                                                                                                                                                                                                                                                                                                                                                                                                                                                                                                                                                                                                                                                                                                                                                                                                                                                                                |
|---------------------------------|--------------------------------------------------------------------------------------------------------------------------------------------------------------------------------------------------------------------------------------------------------------------------------------------------------------------------------------------------------------------------------------------------------------------------------------------------------------------------------------------------------------------------------------------------------------------------------------------------------------------------------------------------------------------------------------------------------------------------------------------------------------------------------------------------------------------------------------------------------------------------------------------------------------------------------------------------------------------------------------------------------------------------------|
|                                 | CGAAGCGTTTTGCTGTGAAAGAAGCCGCAGCAAAAGCGTTTGGCACCAGGATCCGCAATGGTCTGGCGTTTAATC<br>AATTTGAAGTATTCAATGATGAGCTCGGCAAACACCGCTACGGCTATGGGGCGAGGCATTAATACTGGCGGAAA<br>AGCTGGGCGTTGCAAATATGCATGTAACGCTGGCAGATGAGCGGCACTATGCTTGCCACGGTAATTATTGAAAG<br>TTAA                                                                                                                                                                                                                                                                                                                                                                                                                                                                                                                                                                                                                                                                                                                                                                                |
| <i>Cypb5</i>                    | GCTGGTCAATCTGACAAGGACGTCAAGTACTACACCCTGGAAGAGATCCAAAAGCACAAGGACTCTAAGTCCACC<br>TGGGTTATCTTGACCACAAGGTTTACGACCTGACCAAGTCTTGAAGAACACCCTGGTGGTGAAGAGGTCTTGA<br>GAGAACAAGCCGGTGGTGTGCTACTGAAAACCTTGAAGATGTTGGTCACTCCACTGACGCTAGAGAGTTGTCCA<br>AGACTTACATCATCGGTGAGTTGCACCCAGACGACAGATCCAAGATTGCTAAGCCATCCGACACTCTGATCACTAC<br>CGTTGAATCTAACTCCTCCTGGTGGACTAACTGGGTTATTCCAGCTATTCCGCTTTGGCCGTTGCCTTGATGTACAG<br>GTTGTACATGGCTGAGGAC                                                                                                                                                                                                                                                                                                                                                                                                                                                                                                                                                                                                 |
| <i>Cypb5R</i>                   | GCTGAAACCGAAGAAGAAGAGGATTCCGAGGCTTGGTTGAGATTGAAGCCAGTTGAACCATTGCCATCTCAGTGT<br>TGTGGTTCTGGTTGTTCCCCATGCGTTTTGCACTTGTACTACAGAGACTTGGAGAGATGGGAGACTGCTAGAGCTAG<br>AAACGACAGATCCTTGTTGTCCGGTAAGCAACCACAGAGTCTCAATCTTGTTCCGCTAAGTTGTCCCCAGAGACT<br>TTCTTGGCTTTCCACATCTCCACCATGGAAAAGGTTACCAAGGACACCTACCTGGTCAGATTCACTTTGCCAGGTAA<br>CTCCAGATTGGGTTTGCCTCCAGGTCAGCACTTGATCTTGAGAGGTGTTGTTGACGGTTTGGAGATCCAGAGAGCTT<br>ACACCCCAATCTCTCCAGTACTGCTGAAGGTTACTTCGACGTCCTGATCAAGTGTTACAGAACCAGGTTTGATGTCC<br>CAGTACGTCGAGTCTTGGAGAAGTGGTGATACTGCCTTTTGGAGAGGTCCTTTCGGTTCATTCTGTACGAGCCAAA<br>GAAATACGGTGAGTTGTTGATGTTGGCTGCCGCTACTGGTTTGGCTCCAATGGTTCCAATCTTGCACTCCATTACTG<br>ATGACGAGGACGACGAGACTTTCGTTACCTTGGTTGGTTGCTTCAAGACCTTCGAGGGTATCTACCTTAAGACATTC<br>TTCCAAGAGCAGGCCAGATTCTGGAACGTTACAGACCTTCTCGTTCTGTCCCAAGAGGTTTCTCCAGAGCAATTGCC<br>ATGGTCTTACAGAGACAAGACCCACTTCGGTAGATTGGGTCAAGAATTGGTTGCTGAGTTGGTCGCCTGTTGCAGA<br>AGAAAGCCTTTCACCTTGGTTTGTGGTTCCCCAGCTTCAACGAGGACATGGCTAGATGTTTGTGTCTGCTGGTTG<br>ACCGAGGACTCCTACTTCTGTTCTAA |
| <b>T2A1</b>                     | AGA GCT GAG GGT AGA GGT TCT TTG CTT ACT TGC GGT GAC GTT GAG GAA AAC CCA<br>GGT CCA                                                                                                                                                                                                                                                                                                                                                                                                                                                                                                                                                                                                                                                                                                                                                                                                                                                                                                                                             |
| <b>T2A2</b>                     | CGTGCCGAAGGACGTGGATCCCTTTTGACCTGCGGAGATGTCGAAGAGAATCCTGGACCT                                                                                                                                                                                                                                                                                                                                                                                                                                                                                                                                                                                                                                                                                                                                                                                                                                                                                                                                                                   |
| <b>ACC1-S1151A<br/>fragment</b> | CGTGCCTGAAGCTATGAGAACTCCTCCAGcAAtaGgTcTtCcAtcTtATGGATAGAGCAGTTgcCGTCTCCGATTTGA<br>CCTTCATGATCAACAAGAAATgactccagccacttcgtACAGGTATCATAATTCCCACAAACCACTTAGATGA                                                                                                                                                                                                                                                                                                                                                                                                                                                                                                                                                                                                                                                                                                                                                                                                                                                                    |

**Table S2.** Primer list for construction of knock-out cassettes, expression cassettes and CRISPR plasmids

| Primer name                           | Primer sequence 5'-3'                                          |
|---------------------------------------|----------------------------------------------------------------|
| <b>Primers for initial knock-outs</b> |                                                                |
| ole1-1-up_fwd                         | CTCGAGTTTTTCAGCAAGATATCAAACAAAGAGCCCAAGAC                      |
| ole1-1-up_rev                         | ATATACTTGCTGTGTGGCGTAGATGAAG                                   |
| ole1-1_down_fwd                       | ACGCCACACAGCAAGTATATATATAAAATCGTTAGGGAAATTTTATTAG              |
| ole1-1_down_rev                       | AGGAGATCTTCTAGAAAGATATCGATGGTTCAGAGGGCAAG                      |
| ole1-2_up_fwd                         | CTCGAGTTTTTCAGCAAGATATCAGTACAAGAAGTCTAGTAGAAC                  |
| ole1-2_up_rev                         | CTGCTCGCTCGCCTGGAATCAAATGGTAG                                  |
| ole1-2_down_fwd                       | GATTCCAGGCGAGCGAGCAGTAACACATTAAATAC                            |
| ole1-2_down_rev                       | AGGAGATCTTCTAGAAAGATATCTGGTCTCCCTACCATGTTT                     |
| pox1_down_fw                          | ACTGAAAATCACACGGTGTATTGATTACGTAGTAATGC                         |
| pox1_down_rv                          | AGAATATTGTAGGAGATCTTCTAGAAAGATATCTTTCTTGCTTGGCCC               |
| pox1_up_fw                            | TTCCGGATGGCTCGAGTTTTTCAGCAAGATATCAGGTGGTGAGTTGC                |
| pox1_up_rv                            | CGTAATCAATACACCGTTGTGATTTTCAGTTGTTAGAC                         |
| faa1_down_fw                          | CAATCGGCTGCTCGCTTTCTTGAAGTTTCTTTGTACG                          |
| faa1_down_rv                          | AGAATATTGTAGGAGATCTTCTAGAAAGATATCCCTACGACAATACTTCAG            |
| faa1_up_fw                            | TTCCGGATGGCTCGAGTTTTTCAGCAAGATATCTTGACAGAATATCTGAGTATG         |
| faa1_up_rv                            | GAAAACCTCAAGAAAGCGAGCAGCCGATTG                                 |
| faa2_down_fw                          | ATTCAAGTCTAAAAAGAAGGCAACAAGGAAACG                              |
| faa2_down_rv                          | AGAATATTGTAGGAGATCTTCTAGAAAGATATCACCCGTTCGAACTG                |
| faa2_up_fw                            | TTCCGGATGGCTCGAGTTTTTCAGCAAGATATCATGTGGAGTCGACTG               |
| faa2_up_rv                            | TTCCTTGTTGCCTTCTTTTAGACTTGAATTTATGACCT                         |
| fat1_down_fw                          | AGAAATGCTATTCAAGTGTGAAGCAGATAGTCTTTTC                          |
| fat1_down_rv                          | AGAATATTGTAGGAGATCTTCTAGAAAGATATCAAATATCATGTCAATATGTT<br>G     |
| fat1_up_fw                            | TTCCGGATGGCTCGAGTTTTTCAGCAAGATATCATTATTACTCATGATGAATCA<br>ATTC |
| fat1_up_rv                            | ACTATCTGCTTCACACTGAATAGCATTTCTCAAAAGAC                         |
| <b>ACC1 engineering</b>               |                                                                |
| ACC1TEF_down_fw_new                   | TTCGCCAACGTCGACCGTTTGTGCAACCCGG                                |
| ACC1TEF_prom_fw_new                   | TCGTGTGCAACACGAGGATCCATAACTGTGCGCC                             |
| ACC1TEF_prom_rv_new                   | CGGGTTCGACAAACGGTCGACGTTGGCGAATAAC                             |
| ACC1TEF_up_hom_rv_new                 | GACAGTTATGGATCCTCGTGTGCACACGAC                                 |

|                                                                |                                                       |
|----------------------------------------------------------------|-------------------------------------------------------|
| ACC1_promoter_TEF_donor_down_rv                                | AGAATATTGTAGGAGATCTTCTAGAAAGATATCCTCTGGGGTAGCC        |
| ACC1_promoter_TEF_donor_up_fw                                  | TTCCGGATGGCTCGAGTTTTTCAGCAAGATATCCGTAGAGGCCACC        |
| ACC1phosmut_new_down_fw                                        | TATCATAATTCCCACAAACCACTTAG                            |
| ACC1phosmut_new_up_rev                                         | CTGGAGGAGTTTTCTCATAGCTTC                              |
| ACC1_phos-mut_donor_down_rv                                    | AGAATATTGTAGGAGATCTTCTAGAAAGATATCCTGAAACGTTGTTAATTAAA |
|                                                                | GCAC                                                  |
| Acc1_phos-mut_donor_up_fw                                      | TTCCGGATGGCTCGAGTTTTTCAGCAAGATATCTGCACTTCATTCAAGGTTAC |
| <b>Knock-out cassettes for neutral lipid storage</b>           |                                                       |
| LRO1_up_fwd                                                    | CTCGAGTTTTTCAGCAAGATATCGAACTCTAGCTGTTGTCCGC           |
| LRO1_up_rev                                                    | GATGTAAACAAGGTGAAAGGCTGACGGC                          |
| LRO1_down_fwd                                                  | CCTTTCACCTTGTTTACATCTGTGAGTTGTAAAC                    |
| LRO1_down_rev                                                  | AGGAGATCTTCTAGAAAGATATCGGGTTCCTTTTGATCTGGTC           |
| ARE2_up_fwd                                                    | CTCGAGTTTTTCAGCAAGATATCATTTTCAATAACTACATAAGCCTCTATG   |
| ARE2_up_rev                                                    | CCTCCATTTATAAAATAGGGATATACTTATTTACATGGG               |
| ARE2_down_fwd                                                  | TCCCTATTTATAAAATGGAGGTGAAAGTTTGATTATTC                |
| ARE2_down_rev                                                  | AGGAGATCTTCTAGAAAGATATCTACATAATCATACATGAAAAATGAACTAC  |
| DGA1_up_fwd                                                    | CTCGAGTTTTTCAGCAAGATATCCTTTGATCAGAGTCTCCAC            |
| DGA1_up_rev                                                    | GGCGATAAAAAGTTGAGCCAGTATCTTTTTTAATTG                  |
| DGA1_down_fwd                                                  | TGGCTCAACTTTTTATCGCCAGTTTGCG                          |
| DGA1_down_rev                                                  | AGGAGATCTTCTAGAAAGATATCCTAGGAAGATATAGTTCTGTTTTATTCC   |
| <b>Rad52 overexpression cassette</b>                           |                                                       |
| R52_don_down_F                                                 | GAAGATTAAGTGAGAGAGATGCCATTGCTTATATAGGC                |
| R52_don_GAP_F                                                  | GTCTAAAAACATATGTTTTTGTAGAAATGTCTTGGTGTC               |
| R52_don_GAP_R                                                  | GTCATCGAAAGACATGGTACCTGTGTTTTGATAGTTGTTCAATTG         |
| R52_don_gene_F                                                 | CAAAACACAGGTACCATGTCTTTCGATGACGCTG                    |
| R52_don_gene_R                                                 | CTGACATCCTCTTGATTAATTCTGAAGCTGGAGAGTTTC               |
| R52_don_ter_F                                                  | CCAGCTTCGAATTAATCAAGAGGATGTCAGAATGC                   |
| R52_don_ter_R                                                  | AAGCAATGGCATCTCTCTCACTTAATCTTCTGTACTCTG               |
| R52_don_up_R                                                   | CATTTCTACAAAAAACATATGTTTTTAGACTTGAATTTATGACCTCTG      |
| <b>expression cassette for pentose phosphate pathway genes</b> |                                                       |
| ZWF_do_ARG-TT_F                                                | CTGCACAAGATGTAATATACTGAGTTTGTTAATGATACAATAAACTG       |
| ZWF_do_ARG-TT_R                                                | TTGAACTTTGAAATTGGTACCAATGCGAGGATG                     |
| ZWF_do_Down_F                                                  | CCTCGCATTTGGTACCAATTTCAAAGTTCAACTTCCGC                |
| ZWF_do_DOWN_R                                                  | AGAATATTGTAGGAGATCTTCTAGAAAGATATCATGCTCTCAAGGACTACC   |
| ZWF_do_pHHX1_F                                                 | ATAGATTTGTACCATTTTTCTTTACCTGGATATAAAATAAAAAAAGGAAAC   |
| ZWF_do_pHHX1_R                                                 | TTTCGTATCGGTCATGTTTTATCGATAGTAGTTGAGCAATAAAAAAAG      |
| ZWF_do_SOL_F                                                   | AAAGCTTCAAGCAATTCAGTATTTTGAAGTAGAAACGG                |
| ZWF_do_SOL_R                                                   | TCCAGGTAAAGAAAAATGGTACAAATCTATTCTATGAACG              |
| ZWF_do_TEF-TT_F                                                | CTACTAGCCTTAAGATAGACAGATTCATTGACTCTATGATC             |
| ZWF_do_TEF-TT_R                                                | ACTTCGAAATACTGAATTGCTTGAAGCTTTAATTTATTTTATTAAC        |
| ZWF_do_UP_F                                                    | TTCCGGATGGCTCGAGTTTTTCAGCAAGATGATATCGAGAATGGTGGGATTTG |
| ZWF_do_UP_R                                                    | CAATGAATCTGTCTATCTTAAGGCTAGTAGTGATTGTTCT              |
| ZWF_do_ZWF_F                                                   | TACTATCGATAAAACATGACCGATACGAAAGCC                     |
| ZWF_do_ZWF_R                                                   | AACAAACTCAGTATATTACATCTTGTGCAGCACATC                  |
| <b>NADP+ dependent GDH expression cassette</b>                 |                                                       |
| GDH_do_AOX1TT_F                                                | TCAAGAGGATGTCAGAATGC                                  |
| GDH_do_aox1TT_R                                                | AAGTCCGAAGAAATCGCACAAACGAACGTCTC                      |
| GDH_do_down_F                                                  | GACGTTCGTTTGTGCGATTTCTTCGGACTTTTGCTTAC                |
| GDH_do_down_R                                                  | AGAATATTGTAGGAGATCTTCTAGAAAGATCCCGGGGGTACGTGCTGAAC    |
| GDH_do_GDH_F                                                   | TTCAATCAATTGAACAACATATCAAAACAC                        |
| GDH_do_GDH_R                                                   | CAGGCAAAATGGCATTCTG                                   |
| GDH_do_pGAP_F                                                  | TCCGACTGTAACCCCGGATCCTTTTTTGTAGAAATGTCTTG             |
| GDH_do_pGAP_R                                                  | TGTGTTTTGATAGTTGTTCAATTGATTG                          |
| GDH_do_UP_F                                                    | TTCCGGATGGCTCGAGTTTTTCAGCAAGATCCCGGGGGCCCGACG         |
| GDH_do_up_R                                                    | TACAAAAAAGGATCCGGGGTTACAGTCGGAGTC                     |
| <b>ACL shuttle expression cassette</b>                         |                                                       |
| ACL_ACLp1_F                                                    | ACCACCAAATGGGTAAACC                                   |
| ACL_ACLp1_R                                                    | CATTGATATACAAGATCTATCACAAACAC                         |
| ACL_ACLp2_F                                                    | CTCCTAACTAAAACGTAAAGACTTCC                            |
| ACL_ACLp2_R                                                    | CTGTTGCTGCAATGGTTTACCC                                |
| ACL_CTP1_F                                                     | AACTATATGAACTAACTAATTAAGCAGAAGCAGGAC                  |
| ACL_CTP1_R                                                     | TTTGTAAGAGTAACAATGCCAGAGAAAAGGAAGG                    |
| ACL_dasTT_F                                                    | CTAGATCTTAGTGTTGACCCCTTGACTGACAC                      |
| ACL_dasTT_R                                                    | ACGGGAAGTCTTTACAGTTTTAG                               |
| ACL_down_F                                                     | CCTCCTCTCTTGTTGAATGCTAGCCTAGTTGTCAGAG                 |

|                                               |                                                                  |
|-----------------------------------------------|------------------------------------------------------------------|
| ACL_down_R                                    | AGAATATTGTAGGAGATCTTCTAGAAAGATCCCGGGGTAAAAACACATAAAA<br>CTTG     |
| ACL_htbTT_F                                   | GCTTTCTGATATGTAACATATTTATGAGTTG                                  |
| ACL_htbTT_R                                   | TTCGCGTCGATTTGGTGTGACAAGTTACATCGTTTTCTG                          |
| ACL_MDH_F                                     | CTACAACAATCAAAGATGGTTAAAGTCACAGTTTGCG                            |
| ACL_MDH_R                                     | AAAGCTTCAAGCAATTTAGTTGCCAGCAATGAAGG                              |
| ACL_ME_F                                      | TTCAATCAATTGAACAACATCAAAAC                                       |
| ACL_ME_R                                      | AACTCATAAATATGTTACATATCAGAAAGC                                   |
| ACL_pGAP_F                                    | GAGTGTCTCGTTGAATTTTTTGTAGAAATGTCTTGGTGTG                         |
| ACL_pGAP_R                                    | TGTGTTTTGATAGTTGTTCAATTGATTG                                     |
| ACL_pgk1TT_F                                  | ATGTAACCTGTACACCAAATCGACGCGAAAG                                  |
| ACL_pgk1TT_R                                  | CTTCTGCTTAATTAGTTAGTTTCATATAGTTTGAATTCTGATTTTGATG                |
| ACL_pRP_F                                     | CCTTTTCTCTGGCATTGTTACTCTTACAAAGAACAAGTTTTTTG                     |
| ACL_pRP_R                                     | TGTGACTTTAACCATCTTTGATTGTTGTAGTTAACCTGG                          |
| ACL_pTPI_F                                    | TGTGTTTGTGATAGATCTTGATATCAATG                                    |
| ACL_pTPI_R                                    | CATTTCTACAAAAAATTCAACGAGACACTCTTCC                               |
| ACL_tefTT_F                                   | ATTGCTGGCAACTAAATTGCTTGAAGCTTTAATTTATTTTATTAAC                   |
| ACL_tefTT_R                                   | AACTAGGCTAGCATTACACAAGAGAGGAGGCAG                                |
| ACL_up_F                                      | TTCCGGATGGCTCGAGTTTTTCAGCAAGATCCCGGGTCAAATTTTAACTCG<br>TC        |
| ACL_UP_R                                      | TCAGTCACAAGGGTCAACACTAAGATCTAGAGAATCTGAC                         |
| <b>Elongases knock-out cassettes</b>          |                                                                  |
| Elo2_down_F                                   | ACACCAACTATCAAGTTGTGCTGGCCTAAGGAC                                |
| Elo2_down_R                                   | AGAATATTGTAGGAGATCTTCTAGAAAGATATCCGTTTGCTACTGTATATCC             |
| Elo2_up_F                                     | TTCCGGATGGCTCGAGTTTTTCAGCAAGATATCATATGTTGAAGGTACTACAGC           |
| Elo2_up_R                                     | CTTAGGCCAGCACAACTTGATAGTTGGTGTACTAAAAGG                          |
| Elo3_down_F                                   | CCCACCATCCAAGTAGTTATAAAATATAGAATAAAAAAATCAAGTTCGAG               |
| Elo3_down_R                                   | AGAATATTGTAGGAGATCTTCTAGAAAGATATCACGGATAGGTGAGTGG                |
| Elo3_up_F                                     | GTTTTTCAGCAAGATATCCAGTGAAGAATGCCAAG                              |
| Elo3_up_R                                     | TCTATATTTATAACTACTTGGATGGTGGGTCTACC                              |
| <b>DGA2-TGL3-TGL4 expression cassette</b>     |                                                                  |
| DGA_DGA_F                                     | TCAAGACTTACAATTAAAAATGCCTGAAAAGAAGAACAG                          |
| DGA_DGA_R                                     | ATTAAAGCTTCAAGCAATTCACCTCGACAATTCGTAGC                           |
| DGA_down_F                                    | AATTGGAATGGAAAATTGGCTAGCGCGACTGAAAGCTTATTTTGTTAC                 |
| DGA_down_R                                    | AGCTGAGAATATTGTAGGAGATCTTCTAGAAAGATCCCGGGTCACTATATTTA<br>GCTTGCG |
| DGA_GAP-TT_F                                  | CCCAAGAATCATAAATAAATCGATTGTATGTGAAATAGCTG                        |
| DGA_GAP-TT_R                                  | AAATAAGCTTTTCAGTCGCGCTAGCCAATTTTCCATTCCAATTTGATCG                |
| DGA_HTA-TT_F                                  | CTGCCTCCTCTCTTGTGTCTAACCTTGGTATATTTATAAGAATTCAC                  |
| DGA_HTA-TT_R                                  | CAAAGGAAGATGAGGTAGGTTTCTGCTTAGTTCCCAGTTC                         |
| DGA_pCAT_F                                    | TGCGTAATTACGGAAAATGCTAGCTAATCGAACTCCGAATGCG                      |
| DGA_pCAT_R                                    | GTTCTTCTTTTCAGGCATTTTAATTGTAAGTCTTGACTAGAGC                      |
| DGA_pHHX2_F                                   | TCTAGATGGTTGGGGCATTTTTACTACGATAGACACAAGAAG                       |
| DGA_pHHX2_R                                   | TGCTCCAAATAAGTTCATATTTATTGATTATTTGTTTATGGGTGAGTC                 |
| DGA_TEF-TT_F                                  | CTACGAATTGTCGAGTGAATTGCTTGAAGCTTTAATTTATTTTATTAAC                |
| DGA_TEF-TT_R                                  | TAAATATACCAAGGTTAGACACAAGAGAGGAGGC                               |
| DGA_TGL3_F                                    | TGGGAACTAAGCAGAAACCTACCTCATCTTCCTTTGGTTG                         |
| DGA_TGL3_R_splice                             | GTATCATATTTTGTGTGAATTATGTCCCTGCACCC                              |
| DGA_TGL3_F_splice                             | GGGTGCAGGGACATAATTCACAACAAAATATGATACTTCCAAAC                     |
| DGA_TGL3_R                                    | GTGTCTATCGTAGTAAAAATGCCCAACCATCTAG                               |
| DGA_TGL4_F                                    | AACAAATAATCAATAAATATGAACCTATTGGAGCAGTCAC                         |
| DGA_TGL4_R                                    | TTTCACATACAAATCGATTTATTTATGATTCTTGGGACCCC                        |
| DGA_up_F                                      | AGATCTTCCGGATGGCTCGAGTTTTTCAGCAAGATCCCGGGAATGTCTGTGGGG<br>AG     |
| DGA_up_R                                      | GCATTCCGAGTTCGATTAGCTAGCATTTTCCGTAATTACGCACAG                    |
| <b>S. cerevisiae OLE1 expression cassette</b> |                                                                  |
| Scole1_DASIT_F                                | ACTGGTAAGTTCTTTTAAACGGGAAGTCTTTACAGTTTTAG                        |
| Scole1_DASIT_R                                | AAACTAACTGTTATAGACGACCCTTGTGACTGACAC                             |
| Scole1_ole1_F                                 | AACAACATCAAAACACAATGCCAACTTCTGGAACCTAC                           |
| Scole1_down_F                                 | GTGTCAGTCACAAGGGTCGCTATAACAGTTAGTTTCAAAACATTC                    |
| Scole1_down_R                                 | AGCTGAGAATATTGTAGGAGATCTTCTAGAAAGATCCCGGGAACAGATAA<br>GTGCAC     |
| Scole1_GAP_F                                  | TTTGTCTTTGTTTGTCTCTTTTTTGTAGAAATGTCTTGGTGTG                      |
| Scole1_GAP_R                                  | AGTTCAGAAAGTTGGCATTGTGTTTTGATAGTTGTTCAATTG                       |
| Scole1_ole1_R                                 | ACTGTAAAGACTTCCCGTTTAAAGAACCTACCAGTTTCGTAG                       |

|                                               |                                                                                                        |
|-----------------------------------------------|--------------------------------------------------------------------------------------------------------|
| Sco1_up_F                                     | AGATCTTCCGGATGGCTCGAGTTTTTCAGCAAGATCCCCGGTTGCGTCAAGGAGG                                                |
| Sco1_up_R                                     | AGACATTTCTACAAAAAAGAGACAAACAAAGACAAAGACAAG                                                             |
| <b>'MGA2 expression (from Chr4_NS2 locus)</b> |                                                                                                        |
| MGA_down_F                                    | CCTCCTCTCTTGTGTTTCATCTCCGACTAGACACG                                                                    |
| MGA_down_R                                    | AGAATATTGTAGGAGATCTTCTAGAAAGATATCTGAAAAAGTAATAAATCTAAGTTTCATG                                          |
| MGA_MGA_F                                     | CAATTGATTACGAAAATGAACGAAGCATCTTTGG                                                                     |
| MGA_MGA_R                                     | AAAGCTTCAAGCAATCTATAGCTCCATAACCTTCAAAAG                                                                |
| MGA_PGK_R                                     | AGATGCTTCGTTCAATTTTCGTAATCAATTGGGCTATG                                                                 |
| MGA_pPGK_F                                    | TCAAGTTCAGCAGCGAAGTTGGTACCCAGCCG                                                                       |
| MGA_TEF1TT_F                                  | GTTATGGAGCTATAGATTGCTTGAAGCTTTAATTTATTTTATTAACA                                                        |
| MGA_TEF1TT_R                                  | TCTAGTCGGAGATGAACACAAGAGAGGAGGCAG                                                                      |
| MGA_UP_F                                      | TTCCGGATGGCTCGAGTTTTTCAGCAAGATATCCAAAACACAATACATCAGG                                                   |
| MGA_UP_R                                      | GCTGGGTACCAACTTCGCTGCTGAACCTTGATTATG                                                                   |
| <b>FAS constructs</b>                         |                                                                                                        |
| TEFup UP fw                                   | GGATGGCTCGAGTTTTTCAGCAAGATATTTAAATGTAGTACTTCATCTGCTTCGG                                                |
| TEFup UP rev-AOX1TT                           | GCTCTTCAGAGTACAGAAGATTAAGTGAGAAGGCCAGACAGGATTGG                                                        |
| PpFAS1 up fw                                  | CGGATGGCTCGAGTTTTTCAGCAAGATATTTAAATCTTCTAAGGGTATCTTTGGAACAC                                            |
| PpFAS1 up rev-AOX1TT                          | GAAGATTAAGTGAGAATCAAATATTCGCCCTTGAAGTAGTAG                                                             |
| AOX1TT fw                                     | GAGATACCAGAGATAATCAAGAGGATGTCAGAATGCCATTTG                                                             |
| AOX1term rev                                  | TCTCACTTAATCTTCTGTACTCTGAAGAGG                                                                         |
| AOX1TT rev-PpFAS1up                           | GGGCGAATATTTGATTCTCACTTAATCTTCTGTACTCTGAAGAGG                                                          |
| BaPPT1 fw                                     | CAAACTATATTTAAACTACAACAATGTTGGACAACAGAGAAGCC                                                           |
| BaPPT1 rev                                    | TGACATCCTCTTGATTATCTCTGGTATCTCAACAAACACTGGCAGGCAAATGGCATTCTGACATCCTCTTGATTAACCTTCAATAATTACCGTGGCACAAGC |
| AOX1term-acpS rev                             | CCATCTCATACTCAAACCTATATTTAAACTACAACAATGGCAATATTAGGTTTAGGCACGG                                          |
| pHTX-acpS fw                                  | CTCAGGCAAATGGCATTCTGACATCCTCTTGACTATTTCTTAGTAGAAACGGCGACCGC                                            |
| AOX1TT-ScFAS2 rev                             | CCATCTCATACTCAAACCTATATTTAAACTACAACAATGAAGCCGGAAGTTGAGCAAG                                             |
| pHTX1-ScFAS2 fw                               | GTTGTCCAACATTGTTGTAGTTTTAATATAGTTTGAGTATGAGATGGTTTGATTGTTTAGGTAACCTGAACTGGATG                          |
| pHTX1 fw                                      | CATCCAGTTCAAGTTACCTAAACAAATCAAAATGGACGCTTACTCCACAAGAC                                                  |
| pHTX1 rev                                     | ACTGATTAAGCAAATGTAATTAATAAAACGATTAGGATTGTTCACTTTTCC                                                    |
| ScFAS1 fw                                     | CAGTTGCATCCAGTTCAAGTTACCTAAACAAATCAAAATGGAAGAGGTTGTTATCGCTGAAAGCAGAAGCTGGATCACCAAGAGC                  |
| ScFAS1 rev                                    | CTGCTCTTGGTGATCCAGCTTCTGC                                                                              |
| hFAS_1 fw                                     | AAACTGATTAAGCAAATGTAATTAATAAAACGATTAAACCTCTCTAACAGAA                                                   |
| hFAS_1 rev                                    | ACTCTTG                                                                                                |
| hFAS_2 fw                                     | CATCCAGTTCAAGTTACCTAAACAAATCAAAATGACCATCGGTATCTCCAACC                                                  |
| hFAS_2 rev                                    | ATACCAGGGATCATGATGAAGGATCTCATACC                                                                       |
| BaFAS_1 fw                                    | TATGAGATCCTTCATCATGATCCCTGGTATC                                                                        |
| BaFAS_1 rev                                   | CCCCAACTGATTAAGCAAATGTAATTAATAAAACGATTATTGGTGGAAGCAGTTGATC                                             |
| BaFAS_2 fw                                    | CTCGTGTCAGATTGCGTATCAAG                                                                                |
| BaFAS_2 rev                                   | AGAATATTGTAGGAGATCTTCTAGAAAGATATTTAAATTGGGACGAATGGGACAG                                                |
| TEFup DOWN fw                                 | CTTGATACGCAATCTGACACGAGTTATTGGTGGAAGCAGTTGATCTCTTC                                                     |
| TEFup DOWN rev                                | CTTGATACGCAATCTGACACGAGTTAACCTCTCTAACAGAACTCTTGGC                                                      |
| TEFup DOWN-BaFAS rev                          | CTTGATACGCAATCTGACACGAGTTAGGATTGTTCACTTTTCCCAGTTGTC                                                    |
| TEFup DOWN-hFAS rev                           | TCGTTTTATTTAATTACATTGCTTAATCAGTTTGGG                                                                   |
| TEFup DOWN-ScFAS1 rev                         | GCTGAGAATATTGTAGGAGATCTTCTAGAAAGATATTTAAATTCTGTTGGTTCACGCTG                                            |
| PpFAS1 down fw                                |                                                                                                        |
| PpFAS1 down rev                               | CCTCGCATTGGTACCGAAGTTCCTATACTTTCTAGAGAATAGG                                                            |
| <b>Expression from His4 locus</b>             |                                                                                                        |
| His4_Down_F_TTArg4                            | AGAATATTGTAGGAGATCTTCTAGAAAGATAAATATGCCTGAATTAGGGACTTTG                                                |
| His4_down_R_pJET                              | TCTCGCTTGGATCCTTTTTTGTAGAAATGCTTGGTGTC                                                                 |
| His4_PGAP_F_His4up                            | CTGCAGCATATGGCGCCGCTTAATTAAGTCGACTGTGTTTTGATAGTTGTTCAATTGATTG                                          |
| His4_pGAP_R_MCS                               |                                                                                                        |



|                                                |                                                                   |
|------------------------------------------------|-------------------------------------------------------------------|
| His4_TTArg4_F_MCS                              | ACTTAATTAAGCGGCCGCCATATGCTGCAGTATACTGAGTTTGTTAATGATACAATAAAC      |
| His4_TTArg4_R_Down                             | AAGTATAGGAACTTCGGTACCAATGCGAGGATGCTGCTG                           |
| His4_up_F_pJET                                 | TTCCGGATGGCTCGAGTTTTTCAGCAAGATAAAATGAGCTGAAGAAACTGATTC            |
| HIS4_up_R_PGAP                                 | ACATTTCTACAAAAAAGGATCCAAGCGAGAGAC                                 |
| Fw_QC_pJet_PstI del                            | GCCGCCCTACAGCCGAAT                                                |
| Rv_QC_pJet_PstI del                            | ATTCCGGCTGTAGGGGCGGC                                              |
| His4_linear_F                                  | AAATGAGCTGAAGAAACTGATTC                                           |
| His4_linear_R                                  | AAATATGCCTGAATTAGGGACTTTG                                         |
| <b>Tefup::CeFAT expression cassette</b>        |                                                                   |
| TEFup-CeFAT_DOWN_R                             | AGAATATTGTAGGAGATCTTCTAGAAAGATATTTAAATTGGGACGAATGGGACAG           |
| TEFup_CeFAT_F_P-PGK                            | ATGACCCAGATCAAGGTTGACG                                            |
| TEFupCeFAT_UP_F_pJET                           | GGATGGCTCGAGTTTTTCAGCAAGATATTTAAATGTAGTACTTCATCTGCTTCGG           |
| Tef1prom_bam-MCS-ARG4ter_rev                   | G                                                                 |
| pPGK-TEFup UP rev                              | GCAATCTGACACGAGATGCGAGGATGCTGCTGGAGAC                             |
| pPGK fw                                        | GTGATCGGCTGGGTACCAACTTAGGCCAGACAGGATTGG                           |
| CeFAT-pPGK rev                                 | AAGTTGGTACCCAGCCGATCAC                                            |
| TEF-down_F_TTArg4                              | CGTCAACCTTGATCTGGGTCATTTTCGTAATCAATTGGGCTATGCTAAGAG               |
| <b>ole1-1::CeFAT expression construct</b>      | GCAGCATCCTCGCATCTCGTGTCAGATTGCGTATCAAG                            |
| Fw_insertGAP_CeFAT-OLE1-1                      | ATTTCCCTAACGATTTATATATACTTGCTTTTTGTAGAAATGTCTTGGTGTC              |
| Rv_insert_TT_CeFAT-OLE1-1                      | TTAGTCTTCTCACTTCATCTACGCCACACAGGTACCAATGCGAGGATG                  |
| Ole1-1_up_open_rev                             | TGTGTGGCGTAGATGAAGTG                                              |
| Ole1-1_down_open-fw                            | GCAAGTATATATATAAAATCGTTAGGG                                       |
| <b>FLDup::MmSCD3 expression construct</b>      |                                                                   |
| FLD_UP_F                                       | GTTTTTCTGAATCTGAAAAGCTTACCTTATGAG                                 |
| FLD_UP_R                                       | GACAGTTATGGATCCTTGGCGAGATCAATGGAAGG                               |
| FLD_Tef1_F                                     | CATTGATCTCGCCAAGGATCCATAACTGTCGCCTCTTTTATC                        |
| FLD_TEF1_R                                     | TTTCGGTCGACGTTGGCGAATAACTAAAATGTATGTAGTG                          |
| FLD-MmSCD3 F                                   | CACTACATACATTTTAGTTATTCGCCAACGTCGACCGAAACGATGCCAGGTCACTTGCTG      |
| FLD-MmSCD3_R                                   | GTTTATTGTATCATTAAACAACTCAGTATACTGCAGTTAACCGGACTTGTGAGAACCGTC      |
| FLD_ARG4TT F                                   | CTGCAGTATACTGAGTTTGTTAATGATACAATAAAC                              |
| FLD_ARG4TT_R                                   | CCGTGCCAGAGATTCATGCGAGGATGCTGCTGGAGAC                             |
| FLD_down_fwd                                   | GCAGCATCCTCGCATGAATCTCTGGCACGGTGCTAATG                            |
| FLD_down rev                                   | CTGCACTCAGGAGTGACAGAAG                                            |
| <b>SCD3-T2A-MmCyb5-T2A-MmCyb5Red construct</b> |                                                                   |
| T2A-SCD3 rev                                   | ACGTCACCGCAAGTAAGCAAAGAACCTCTACCCTCAGCTCTACCGGACTTGTGAGAACCG      |
| MmCyb5Red-ARG4term fw                          | GACCGAGGACTCCTACTTCTTGTCTAATATACTGAGTTTGTTAATGATACAATAAACTG       |
| T2A1 fw                                        | AGAGCTGAGGGTAGAGGTTT                                              |
| MmCyb5 rev                                     | ACATCTCCGCAGGTCAAAAG                                              |
| MmCyb5Red fw                                   | AGGACGTGGATCCCTTTTG                                               |
| MmCyb5Red rev                                  | TTAGAACAAGAAGTAGGAGTCCTCG                                         |
| <b>SCD3-T2A-PpCyb5-T2A-PpCyb5Red construct</b> |                                                                   |
| T2A-PpCyb5 fw                                  | TTCTTTGCTTACTTGCGGTGACGTTGAGGAAAACCCAGGTCCATCTGAAGAAGAAGAACTCAAGG |
| T2A-PpCyb5 rev                                 | ACATCTCCGCAGGTCAAAAGGGATCCACGTCCTTCGGCACGCTGGTTGAAGAAATAGTATGCAAC |
| T2A-PpCyb5Red fw                               | TCCCTTTTGACCTGCGGAGATGTCGAAGAGAATCCTGGACCTGACAATAACGTGTTGTATTAC   |
| PpCyb5Red rev                                  | CTAAAAGACAAATACTTGATCAGCCAAC                                      |
| PpCyb5Red-ARG4term fw                          | GTTGGCTGATCAAGTATTTGTCTTTTAGTATACTGAGTTTGTTAATGATACAATAAACTG      |
| <b>PK-PTA construct</b>                        |                                                                   |
| PK_UP_F                                        | TCTTCCGGATGGCTCGAGTTTTTCAGCAAGATATCTACTATGATTGTAGATAGATAATGC      |
| PK_UP_R                                        | TTCAAACCTTCTCACCTCCTTATTGTTTCTGATATAATTAGTTTGACGTG                |
| PK_FDH1TT_F                                    | TATATCAGAAACAATAAGGAGGTGAGAAGTTTGAAGG                             |
| PK_FDH1TT_R                                    | GCAGGTGACAACGAATAATTGAAATGTATTTAATTTGATATTAAGTAAATGAATG           |
| PK_BbPK_p2_R                                   | TAATG                                                             |
| PK_BbPK_p2_F                                   | AAATTAATACATTTCAATTATTCTGTTGTCACCTGCAGACAGTTGGAAGCTACAAGAAGCT     |



**Table S3.** CRISPR target sites used in this study

| target site                   | target sequence N20 5'-3' | PAM |
|-------------------------------|---------------------------|-----|
| <i>FAD12</i>                  | GGTGTTTGTACCTGCCACAA      | TGG |
| <i>OLE1-1</i>                 | GGATTCTGGTACTCCCACAT      | GGG |
| <i>OLE1-1</i>                 | TCTCAGACCTCGCTGATGAC      | TGG |
| <i>OLE1-1</i>                 | GGTGGTCTGTCAATTACAGC      | TGG |
| <i>OLE1-2</i>                 | TTCCCGCAATAATTGGCTGG      | TGG |
| <i>POX1</i>                   | GAAGACGACGCTGGTGCAAT      | GGG |
| <i>POX1</i>                   | AATCAATTTGAGTTCCTCTG      | AGG |
| <i>FAA1</i>                   | GTCGGATTGGCAATTTCCGA      | TGG |
| <i>FAA1</i>                   | TGAAGGCCTTCAGGTCGGAT      | TGG |
| <i>FAA2</i>                   | AACGCTGAGTATTCTTCCCT      | TGG |
| <i>FAA2</i>                   | TCCAGCGACAAGCGCTAGAT      | TGG |
| <i>FAT1</i>                   | GCCACTCATATCCAGTACGT      | TGG |
| <i>FAT1</i>                   | TAGAGTCTGGTTGAATCCTC      | AGG |
| <i>TesA</i>                   | AAGGTCTGCTCAGTCTGTTG      | TGG |
| <i>TesA</i>                   | GAAGCAACACCAGCCAAGAT      | GGG |
| <i>ACC1-S1159A</i>            | TAACCGATCCTCTATTTCAA      | TGG |
| <i>ACC1-S1159A</i>            | GATTCTCAACCTTTGAGAAC      | AGG |
| <i>ACC1-promoter</i>          | AATTTGGTGTATTAAGTGGT      | AGG |
| <i>ACC1-promoter</i>          | CGATTGAGAGACACGAGAAA      | TGG |
| <i>DGA1</i>                   | GAGAGATTACTTAATGGCAT      | TGG |
| <i>LRO1</i>                   | TGGGTTGAAGCTGACGGATA      | CGG |
| <i>LRO1</i>                   | AGCAACAGCGATTCTATGA       | AGG |
| <i>LRO1</i>                   | GCCGATGTGCGATTCAAGTC      | TGG |
| <i>ARE2</i>                   | TGGATCGCTTCCAGAGCCAA      | CGG |
| <i>ARE2</i>                   | TCGACTCTCGCCACTGGGAT      | CGG |
| <i>ARE2</i>                   | ATCTACTCGATACGATAAGA      | AGG |
| <i>Chr1_Ns6</i>               | GACCCCGTAATAATCGACGT      | CGG |
| <i>Chr1_Ns6</i>               | TTCCGACGTCGATTATTACG      | GGG |
| <i>Chr1_Ns10</i>              | TAGTTCTGTGACATAGTACC      | AGG |
| <i>Chr1_Ns10</i>              | AGAAATCTCGAAAACACCCC      | TGG |
| <i>Chr2_Ns3</i>               | TATAAGGCTCTTGTAGATGG      | AGG |
| <i>Chr2_Ns3</i>               | GTGTTCTGCTTGTGATATA       | AGG |
| <i>Chr3_Ns7</i>               | AAAGCTAATTAGTCTCATAA      | TGG |
| <i>Chr3_Ns7</i>               | TACCGAAGTCTTCCATAACT      | AGG |
| <i>Chr4_Ns2</i>               | AATAATTGCAGGGCAGATGG      | TGG |
| <i>Chr4_Ns2</i>               | AAAAGAAATAATTCAATGCA      | TGG |
| <i>Chr4_Ns4</i>               | ATGAAAAAGATACGGGGCAG      | AGG |
| <i>Chr4_Ns4</i>               | GTTGTCAAATGAAAAAGATA      | CGG |
| <i>Chr4_Ns7</i>               | TCAAAAGCTTGATTTATAGC      | TGG |
| <i>Chr4_Ns7</i>               | TCTCGATGGACGGATAACAG      | AGG |
| <i>ELO2</i>                   | GGCCATAGTTCGATGCCAAA      | GGG |
| <i>ELO2</i>                   | AGCACCGTGGGTGGCTTTAG      | AGG |
| <i>ELO3</i>                   | ATACCGTATTGAACATACGA      | CGG |
| <i>ELO3</i>                   | GGCCATAAACGGATTCCAAA      | AGG |
| <i>ELO100</i>                 | GGAAGTAAAGGAGAATCTGG      | AGG |
| <i>ELO100</i>                 | TACGAGAGGGCAAACACCAA      | TGG |
| <i>FAA2-outer (for RAD52)</i> | GACGAGAGCTTGTTCAAACG      | AGG |
| <i>FAA2-outer (for RAD52)</i> | ATAATTAAAGATTTGGAGGA      | GGG |
| <i>PXA1</i>                   | GTAGCTTATGAGGTAAGATG      | AGG |
| <i>PXA1</i>                   | GGTCCAACGGATGTTCAACT      | GGG |

---

|               |                      |     |
|---------------|----------------------|-----|
| <i>FAD15</i>  | ACATGTTCTCGTCAGTGTGA | CGG |
| <i>PpFAS1</i> | CGACGACGAGCCGAGCTCCA | AGG |
| <i>PpFAS1</i> | CAGATCTACGCCATATTTGG | AGG |
| <i>PpFAS1</i> | CCAAGGTCTGGTCACCGCTG | TGG |
| <i>PpFAS1</i> | TGCCCCAAGCAAAGACTTGG | TGG |
| <i>His4</i>   | TGCCAAGTACGGTGTGACGT | TGG |
| <i>His4</i>   | AACGAGAGCAGACTACACCA | GGG |
| <i>TEFup</i>  | GCAAGATGGTTAAAAGGTGA | AGG |
| <i>TEFup</i>  | GAATGGGCAAGATGGTTAAA | AGG |
| <i>FLDup</i>  | GCGGCAGTAATTGATATCGT | AGG |

---

**Table S4.** Cell wet weights from strains cultivated in 96-deep well plates (see methods).

| strain <i>Pp</i> # | WT   | #28  | #29  | #32  | #35  | #37  | #39  | #51  | #150 | #140 |
|--------------------|------|------|------|------|------|------|------|------|------|------|
| CWW [g/L]          | 53.8 | 31.5 | 27.1 | 18.6 | 18.8 | 18.1 | 20.6 | 20.0 | 16.5 | 28.3 |
| strain <i>Pp</i> # | #135 | #44  | #45  | #46  | #47  | #48  | #53  | #49  | #50  | #54  |
| CWW [g/L]          | 20.3 | 20.0 | 19.3 | 23.3 | 34.3 | 33.3 | 38.3 | 22.1 | 24.1 | 29.0 |
| strain <i>Pp</i> # | #121 | #117 | #114 | #142 | #153 | #145 | #141 | #112 | #113 | #67  |
| CWW [g/L]          | 26.5 | 26.1 | 29.1 | 31.0 | 27.1 | 24.3 | 22.8 | 24.3 | 24.1 | 25.5 |
| strain <i>Pp</i> # | #91  | #85  | #89  | #148 | #138 | #136 |      |      |      |      |
| CWW [g/L]          | 25.0 | 14.3 | 12.5 | 13.5 | 25.0 | 25.0 |      |      |      |      |

**Table S5.** Medium compositions tested for free fatty acid production with strain *Pp*#39. Glucose and nitrogen source concentrations as well as carbon to nitrogen (C/N) ratios are given. Carbon and Nitrogen contents for yeast extract and peptone were estimated based on carbon and nitrogen contents commonly found in yeast biomass and casein, respectively. Hence, the exact values may deviate.

| Medium | Glucose [g/L] | K <sub>2</sub> HPO <sub>4</sub> [g/L] | KH <sub>2</sub> PO <sub>4</sub> [g/L] | YNB w/o AS AA [g/L] | Nitrogen-source   | Nitrogen-source concentration [g/L] | C/N ratio |
|--------|---------------|---------------------------------------|---------------------------------------|---------------------|-------------------|-------------------------------------|-----------|
| BMD1   | 30            | 3.5                                   | 13.6                                  | 3.8                 | Ammonium sulfate  | 10.0                                | 6         |
| BMD2   | 30            | 3.5                                   | 13.6                                  | 3.8                 | Ammonium sulfate  | 0.5                                 | 113       |
| BMD3   | 30            | 3.5                                   | 13.6                                  | 3.8                 | Ammonium sulfate  | 1.0                                 | 57        |
| BMD4   | 30            | 3.5                                   | 13.6                                  | 3.8                 | Ammonium sulfate  | 1.9                                 | 30        |
| BMD5   | 30            | 3.5                                   | 13.6                                  | 3.8                 | Ammonium sulfate  | 3.5                                 | 16        |
| BMD6   | 30            | 3.5                                   | 13.6                                  | 3.8                 | Yeast extract     | 2.0                                 | 51        |
| BMD7   | 30            | 3.5                                   | 13.6                                  | 3.8                 | Yeast extract     | 4.0                                 | 25        |
| BMD8   | 30            | 3.5                                   | 13.6                                  | 3.8                 | Yeast extract     | 6.0                                 | 17        |
| BMD9   | 30            | 3.5                                   | 13.6                                  | 3.8                 | Ammonium chloride | 0.5                                 | 92        |
| BMD10  | 30            | 3.5                                   | 13.6                                  | 3.8                 | Ammonium chloride | 1.0                                 | 46        |
| BMD11  | 30            | 3.5                                   | 13.6                                  | 3.8                 | Ammonium chloride | 1.9                                 | 24        |
| BMD12  | 30            | 3.5                                   | 13.6                                  | 3.8                 | Ammonium chloride | 3.5                                 | 13        |
| BMD13  | 30            | 3.5                                   | 13.6                                  | 3.8                 | Bacto peptone     | 2.0                                 | 43        |
| BMD14  | 30            | 3.5                                   | 13.6                                  | 3.8                 | Bacto peptone     | 4.0                                 | 23        |
| BMD15  | 30            | 3.5                                   | 13.6                                  | 3.8                 | Bacto peptone     | 6.5                                 | 16        |

## Supplementary methods

### Supplementary method S1: Extended GC method for separation of C18:1, C18:2 & C18:3

FAMES were prepared as described in the materials and methods section. FAMES were quantified using a Shimadzu GC-2010 Plus device with a flame ionization detector FID-2010 plus (GC-FID), equipped with a Zebron ZB-Wax 7hm-g007-11 30m x 0.32 mm x 0.25 µm column and operated with helium as carrier gas. The flow rate was set to 15.4 mL/min (linear velocity 34.2 cm/sec). An injection volume of 1 µl with a split ratio of 5 was applied. The temperature program started with an initial hold at 50 °C for 1 min, followed by a ramp to 150 °C with a linear increase of 10 °C/min, another ramp to 250 °C with a linear increase of 4 °C/min and a final hold of 4 min. Injection and FID temperatures were set to 220 °C and 250 °C, respectively.

### Supplementary method S2: Lipid extraction from *P. pastoris* strain and lipid analysis with thin layer chromatography

Selected strains were cultivated in 30 ml BDM11 medium (Table 1) in 300 mL baffled shake flasks, shaken at 130 rpm and 28 °C for 96 h. A suspension volume corresponding to 60 OD<sub>600</sub> units was centrifuged at 16,000 x g for 1 min and washed once with deionized water. The resulting cell pellet was subjected to lipid extraction using 0.5 mL methanol

and 1 mL chloroform [105] in a glass tube. After an initial 10 min mixing step, 0.3 ml deionized water was added and the samples were mixed for another 10 min. Phase separation was promoted by centrifugation (5 min at 4500 g) and the lower chloroform phase was used for TLC analysis.

The TLC analysis was conducted as previously described with modifications [106]. In brief, lipid extracts were applied on a TLC plate (silica coated aluminum sheet: TLC Silica gel 60, Merck KGaA, 64271 Darmstadt, Germany) using glass capillaries (10 transfers with a 100 µl capillary). The TLC chamber was saturated with solvent 1 (petroleum, diethyl ether and acetic acid 70:30:2; per vol.) for 30 min and the TLC plate was inserted for separation. Separation was stopped when the solvent front reached the upper end of the TLC plate (only solvent 1 was used for separation). After drying, the plate was submerged in charring solution [107] and heated for 20 min at 100 °C to visualize lipid bands.

Note: The references are listed in the bibliography of the main text.

## Additional Information

### Additional information S1: expression cassette assembly

#### Expression cassettes targeted to *HIS4* locus

The up- and downstream flanking regions of the *HIS4* locus, *GAP* promoter and *ARG4* transcription terminator were PCR amplified from genomic DNA and assembled with the linearized pJET1.2 blunt end cloning vector via Gibson assembly. The overlaps between the *GAP* promoter and *ARG4* terminator fragments reconstituted a multiple cloning site containing *PstI* and *Sall* restriction sites. A *PstI* restriction site in the vector backbone was abolished by site directed mutagenesis (Quikchange PCR) using primers Fw\_QC\_pJet\_PstI~~del~~ and Rv\_QC\_pJet\_PstI~~del~~. The resulting vector and heterologous genes '*TesA*, *MtFAT-A*, *AtFAT-B* and *CeFAT* were digested with *PstI* and *Sall* and were ligated to generate the complete expression cassettes. Primers His4\_linear\_F and His4\_linear\_R were used to linearize the expression cassettes prior to transformation.

#### TEFup::CeFAT construct

The *CeFAT* coding sequence and the *ARG4* transcription terminator were amplified from the *HIS4* targeting vector (section Expression cassettes targeted to *HIS4* locus) using primers TEFup\_CeFAT\_F\_P-PGK and Tef1prom\_bam-MCS-ARG4ter\_rev, were then assembled with all other fragments.

#### *ole1-1*::CeFAT expression cassette

The vector bearing the *ole1-1* deletion cassette (pJET1.2-*ole1-1*up-*ole1-1*down) was linearized by PCR amplification with primers Ole1-1\_up\_open\_rev and Ole1-1\_down\_open-fw. The *CeFAT* expression cassette (*GAP* promoter, *CeFAT* coding sequence, *ARG4* transcription terminator) was amplified from the *HIS4* targeting vector (section Expression cassettes targeted to *His4* locus) using primers Fw\_insertGAP\_CeFAT-OLE1-1 and Rv\_insert\_TT\_CeFAT-OLE1-1 and inserted into the linearized pJET1.2-*ole1-1*up-*ole1-1*down vector to generate a replacement cassette.

#### *ACC1*<sup>S1151A</sup> donor cassette & CRISPR sites

CRISPR target sites were selected in close proximity to the phosphorylation site in the *ACC1* gene. Homology arms for insertion of the donor cassette were amplified from adjacent regions up- and downstream of the phosphorylation site, each with a length of approximately 1000 bp, using the primers Acc1\_phos-mut\_donor\_up\_fw, ACC1phosmut\_new\_up\_rev, ACC1phosmut\_new\_down\_fw and ACC1\_phos-mut\_donor\_down\_rv. Homology arms were connected via a synthetic DNA fragment that contained the altered phosphorylation site as well as short parts of the adjacent regions. CRISPR target sites in the synthetic DNA fragment were modified (exchange of codons to maintain

the amino acid sequence of Acc1p, but change the DNA sequence within the Cas9 recognition site) to avoid digestion of the donor cassette.

#### *SCD3-T2A-MmCyb5-T2A-MmCyb5Red* construct

The expression cassette vector pJET1.2\_FLDup\_PTEF1\_MmSCD3\_TTARG4 was linearized by PCR amplification with primers T2A-SCD3\_rev and MmCyb5Red-ARG4term\_fw to generate a gap between the *MmSCD3* 3' end and the *ARG4* transcription terminator. Two synthetic DNA fragments bearing T2A1 and Cytochrome b5 and T2A2 and Cytochrome b5 reductase from *Mus musculus*, both with compatible overhangs, were inserted in the linearized vector through Gibson assembly.

#### *SCD3-T2A-PpCyb5-T2A-PpCyb5Red* construct

The expression cassette vector pJET1.2\_FLDup\_PTEF1\_MmSCD3\_TTARG4 was linearized by PCR amplification with primers T2A-SCD3\_rev and PpCyb5Red-ARG4term\_fw to generate a gap between the *MmSCD3* 3' end and the *ARG4* transcription terminator. Cytochrome b5 and cytochrome b5 reductase were amplified from *P. pastoris* genomic DNA and T2A sequences were added by the used primers. Both PCR products were inserted into the linearized vector via Gibson assembly.
